1 **Heterochronic Developmental Shifts Underlie Floral Diversity within *Jaltomata***  
2 **(Solanaceae)**

3

4 Jamie L. Kostyun<sup>1\*</sup>, Jill C. Preston<sup>2,a</sup>, and Leonie C. Moyle<sup>1,b</sup>

5

6 <sup>1</sup> *Department of Biology, Indiana University, Bloomington, Indiana 47405, USA*

7 <sup>2</sup> *Department of Plant Biology, The University of Vermont, Burlington, Vermont 05405, USA*

8 <sup>a</sup> [Jill.Preston@uvm.edu](mailto:Jill.Preston@uvm.edu)

9 <sup>b</sup> [lmoyle@indiana.edu](mailto:lmoyle@indiana.edu)

10

11 \*Corresponding author: [jkostyun@indiana.edu](mailto:jkostyun@indiana.edu)

12

13

14

15

16

17

18

19

20

21

22

23

24 **Abstract**

25 **Background:** Haeckel and Darwin, respectively, proposed heterochronic shifts during mid to  
26 late stages of organismal development as key mechanisms generating phenotypic diversity. To  
27 determine whether late heterochronic shifts underlie derived floral morphologies within  
28 *Jaltomata* – a genus with extensive and recently evolved floral diversity – we compared floral  
29 development of four diverse species (including an ambiguously ancestral or secondarily derived  
30 rotate, two putatively independently evolved campanulate, and a tubular morph) to the ancestral  
31 rotate floral form, as well as to an outgroup that shares this ancestral floral morphology.

32  
33 **Results:** We determined that early floral development (<1 mm bud stage) is very similar among  
34 all species, but that different mature floral forms are distinguishable by mid-development (3-4  
35 mm stages) due to differential growth acceleration of corolla traits. Floral ontogeny among  
36 similar mature forms remains comparable until late stages (>5 mm), followed by species-specific  
37 heterochronic shifts in corolla traits.

38  
39 **Conclusions:** Our data suggest shared floral patterning during early-stage development,  
40 continued shared patterning or re-use of similar floral developmental pathways at mid-stage  
41 development, and distinct heterochronic shifts during late-stage development. Heterochrony thus  
42 appears to have been important in the rapid and repeated diversification of *Jaltomata* flowers.

43  
44 **Keywords:** Convergent Evolution, Flower development, Heterochrony, *Jaltomata*, Solanaceae.

45

46

## 47 **Background**

48 In *The Origin of Species*, Darwin stated “we can actually see in embryonic crustaceans and in  
49 many other animals, and in flowers, that organs, which when mature become extremely different,  
50 are at an early stage of growth exactly alike.” [1-2]. This prescient statement both suggests the  
51 importance of understanding diversity in a developmental and phylogenetic framework, and  
52 raises the question about which mechanisms underlie these hypothesized mid to late stage shifts  
53 in ontogeny. Heterochrony—a change in the relative timing or rate of a developmental process  
54 between a derived lineage and its ancestor—is one potential mechanism contributing to such trait  
55 variation [3-4]. Since being formally defined by Haeckel [5], and expanded upon by Gould [6-7],  
56 the concept of heterochrony has been applied to understanding morphological changes,  
57 predominantly in animal taxa. For instance, the classic example of axolotls that retain more  
58 juvenilized features than their ancestors [8], the large variation in cranial morphology among  
59 different dog breeds [9], and even the evolution of extremely complex traits such as  
60 metamorphosis in insects [10], have largely be attributed to heterochronic shifts during  
61 development.

62 The general concept of heterochrony, as well as the distinct processes that comprise this  
63 mechanism of developmental change, can also be meaningfully applied to plant evolution [11-  
64 12]. However, while heterochronic shifts are typically determined in animals by comparing the  
65 relative timing of reproductive versus somatic maturation, in plants this can be challenging given  
66 their indeterminate development. Despite this, heterochrony can still be identified in plants by  
67 examining individual organs or functional units, such as flowers or individual leaves [4].  
68 Broadly, heterochronic shifts include changes in the relative timing of initiation (i.e. onset) or  
69 termination (i.e. offset) of a developmental process – which together determine the duration of

70 this developmental process. Additionally, changes can occur in the rate at which a developmental  
71 process proceeds. Shorter developmental duration or decreased growth rate (termed  
72 pedomorphosis) often results in the reduction or juvenilization of a trait, while longer  
73 developmental duration or increased growth rate (termed peramorphosis) often results in the  
74 elaboration of a trait. Both types of shifts – duration or rate – can conceivably contribute to  
75 observed variation in plant traits [3-4, 13].

76 Unlike plant architecture in general, flowers undergo determinate development, and thus  
77 are particularly attractive subjects for studying the contribution of heterochrony to morphological  
78 divergence. While most flowers conform to a shared ground plan, i.e. egg and pollen-producing  
79 structures surrounded by a non-reproductive perianth (sepals and petals), many lineages exhibit  
80 abundant inter- and intra-specific variation in the organization (phyllotaxy), number (merosity),  
81 size and shape, degree of fusion, and specific identity of floral organs [14-15]. Numerous studies  
82 have examined the potential role of heterochronic changes in floral trait evolution, most often  
83 those associated with mating system transitions. The shift from outcrossing to predominately  
84 selfing is considered one of the most common evolutionary transitions among plants [16-17], and  
85 is typically associated with reduction of flower size, petal size, and/or anther-stigma separation  
86 (herkogamy) – collectively referred to as the ‘selfing syndrome’ [18-19]. Comparative work  
87 examining closely related outcrossing and selfing species has generally revealed that reductions  
88 in floral size result from pedomorphic changes, either from decreased growth rates (i.e. neoteny;  
89 e.g. [20]), or truncation of the growth period [21]. However, some studies have also found that  
90 smaller flowers or those with reduced herkogamy in selfing lineages result from an increased  
91 growth rate over either short [22-23] or long [24] developmental periods. Thus, several distinct  
92 heterochronic processes can result in convergent selfing syndromes.

93           Apart from developmental studies of mating system transitions, comparative ontogenetic  
94 studies have examined floral trait variation likely related to pollinator shifts [25-26]. A classic  
95 example is Guerrant's [27] examination of developmental differences between a pair of  
96 *Delphinium* species – one bee-pollinated, the other hummingbird-pollinated. In that instance, the  
97 derived hummingbird-pollinated flower results from an overall decreased growth rate  
98 (pedomorphosis via neoteny), but also accelerated growth for an extended period (peramorphosis  
99 via acceleration and hypermorphosis) specifically in the reward-providing nectariferous petals.  
100 Nonetheless, despite this increasing attention to the role of heterochrony in plant development,  
101 several critical questions remain, including how frequently heterochronic shifts underlie changes  
102 in floral form, and whether convergent phenotypes may be the result of similar or divergent  
103 developmental mechanisms.

104           *Jaltomata* (Solanaceae) includes approximately 60-80 species distributed from the  
105 Southwestern United States to the Andean region of South America, with extensive and recently  
106 evolved floral diversity [28-30]. Although the pollination biology of this genus has yet to be  
107 formally evaluated, field observations (T. Mione, pers. comm.) reveal that different species are  
108 visited by bees and hummingbirds. In addition, *Jaltomata* produce varying amounts of floral  
109 nectar as a pollinator reward, unlike close relatives like *Solanum* [31-32]. Molecular phylogenies  
110 based on one to several loci [28-30], as well as phylogenomic reconstruction using whole  
111 transcriptomes (Wu, Kostyun, Moyle, unpubl.), indicate that the ancestor of *Jaltomata* had  
112 flattened 'rotate' flowers, while both bell-shaped 'campanulate' and elongated 'tubular' flowers are  
113 derived specifically within the genus (Fig. 1). Further, species with derived campanulate or  
114 tubular forms generally produce more nectar per flower than those with ancestral rotate forms  
115 [30]. Ancestral state reconstruction [30] also suggests that some of the derived campanulate and

116 tubular floral forms found in different *Jaltomata* species evolved independently, allowing  
117 comparison of developmental mechanisms underlying putatively convergent forms.

118         Because both derived campanulate and tubular forms might represent elaborated versions  
119 of the ancestral rotate form, we hypothesized that heterochronic changes (specifically  
120 peramorphic changes such as longer duration of development and/or growth acceleration, which  
121 often produce larger or more elaborated structures) underlie these transitions, particularly during  
122 later stages of ontogeny [1-2, 4]. In addition to evaluating the role of heterochrony in the  
123 evolution of derived floral forms, we also expected that comparing floral development between  
124 species with similar mature morphs--but unresolved phylogenetic relatedness--would provide  
125 insight into their evolutionary origin [30] (Wu, Kostyun, Moyle, unpub.). For instance, if similar  
126 mature forms result from similar developmental processes, this could suggest re-use of similar  
127 pathways or a shared single origin. In contrast, if they result from distinct developmental  
128 processes, this could indicate that these forms are independently derived, or that these forms  
129 share a common evolutionary origin (i.e. are homologous) but underwent developmental systems  
130 drift during their divergence. Follow-up analyses at the molecular level, identifying causative  
131 mutations contributing to trait divergence, could then be used to discriminate further between  
132 hypotheses, with shared mutations being more likely attributed to common descent than to  
133 parallel evolution.

134         Given these considerations, our main goals in this study were to: 1) assess evidence for  
135 heterochronic changes during floral development in species with derived campanulate and  
136 tubular forms; 2) determine which type(s) of heterochronic changes are associated with specific  
137 floral trait changes; and 3) assess whether putatively convergent forms might result from similar  
138 or different developmental processes (i.e. are associated with the same or different types of

139 heterochronic shifts). To address these goals, we examined floral ontogeny of five florally  
140 diverse *Jaltomata* species (including one species with an ancestrally representative rotate corolla  
141 form), as well as an outgroup species that also has an ancestrally representative rotate corolla  
142 form. Our findings support the inference that a combination of parallel and convergent allometric  
143 changes (i.e. shifts in the size of particular floral organs in relation to the entire flower) have  
144 given rise to floral variation in this group, and show that heterochronic shifts explain these  
145 changes. In particular, two types of peramorphic changes (extended duration of floral  
146 development and accelerated growth) predominately explain changes in corolla traits. Thus,  
147 peramorphism emerges as an important developmental mechanism controlling diversity of  
148 *Jaltomata* corolla forms. Finally, species with similar mature campanulate corollas follow  
149 similar but clearly not identical growth trajectories, consistent with phylogenetic inferences that  
150 these campanulate floral morphs have independent origins (Wu, Kostyun, Moyle, unpubl.) (Fig.  
151 1). In contrast, we found that species with similar mature rotate corollas follow nearly identical  
152 developmental trajectories until the very last stages of ontology, suggesting a single evolutionary  
153 origin in this case.

154

## 155 **Methods**

### 156 **Plant materials and growth conditions**

157 Field-collected seeds of our five target *Jaltomata* species were provided by Dr. Thomas Mione  
158 (Central Connecticut State University), and seed for one wild tomato outgroup (*Solanum*  
159 *pimpinellifolium*, accession LA1589) was obtained from the Tomato Genetics Resource Center at  
160 the University of California, Davis (Table S1). We selected this outgroup because *Solanum* is the  
161 sister genus to *Jaltomata* [28-29], this species has an ancestrally representative rotate corolla

162 [32], floral development in this species has previously been characterized [21, 33], and--as a wild  
163 species--its floral development has not been influenced by domestication (i.e. compared to  
164 domestic tomato, *S. lycopersicum*). Our focal *Jaltomata* species included the Central American  
165 species *Jaltomata darcyana* that has an ancestrally representative rotate corolla, and four species  
166 found as natives exclusively in South America: *Jaltomata calliantha* and *Jaltomata dendroidea*  
167 with putatively independently derived campanulate corollas, *Jaltomata umbellata* with a tubular  
168 corolla, and *Jaltomata sinuosa* with a rotate corolla that is ambiguously ancestral or secondarily  
169 derived (Fig. 1). Plants were cultivated in the Indiana University Research Greenhouse, under  
170 standardized temperature (15-20°C) and light (16-hour days) conditions. All plants were watered  
171 to field capacity on automatic driplines, and received weekly fertilizer treatment.

172

### 173 **Floral development**

174 To estimate the duration of floral development, young inflorescences were first identified when  
175 the largest bud was approximately 1 mm, and then evaluated and measured every second day  
176 until first anthesis. To assess relative organ growth during development, buds up to 4 mm in  
177 diameter were collected into 70% ethanol or formalin-acetic acid-alcohol (FAA), dissected as  
178 required, dehydrated through an ethanol series at room temperature, and incubated in a 4°C  
179 fridge over-night. Samples were critical point dried, mounted on aluminum stubs, and sputter-  
180 coated with gold-palladium. They were then imaged using a JEOL 6060 or a JEOL 5800LV  
181 scanning electron microscope (SEM) at the University of Vermont or Indiana University,  
182 respectively. Morphological traits were measured on the resulting bud micrographs using ImageJ  
183 [34]. For buds greater than 4 mm in diameter, morphological traits were measured by hand on  
184 freshly collected samples using digital calipers. Given the potential role of trichomes in



185 regulating corolla shape during bud development [35], we also determined the developmental  
186 timing of trichome initiation and maturation. Because our focal species also vary in nectar  
187 volume per flower, we determined the onset of nectar secretion using a 20x hand-lens.

188

### 189 **Mature floral trait measurements**

190 Mature floral traits were measured with hand-held digital calipers on three flowers each for at  
191 least three individuals per species, and included calyx diameter, sepal length, corolla diameter,  
192 corolla depth, corolla fusion, petal length, lobe length, stamen length, anther length, ovary  
193 diameter, style length, and herkogamy (stigma-anther separation) (Fig. S1). We also measured  
194 nectar volume per flower to the nearest 1  $\mu\text{L}$  with a pipette. To reduce potential environmental  
195 effects on nectar production, nectar volume per flower was always measured during the early  
196 afternoon following watering. Trichome type(s) present on sepals and petals was also scored  
197 using a 20x hand lens.

198

### 199 **Statistical analyses**

200 We used analyses of variance (ANOVA), followed by Tukey's honest significant difference  
201 (HSD) post-hoc tests, to assess differences among species in three comparisons: floral traits on  
202 mature flowers; log-transformed floral organ size at discrete stages during development; and  
203 duration (i.e. number of days) of floral development. To compare relative floral organ growth  
204 rates during development, we used linear regression on log-transformed bud measurements. In  
205 particular, we regressed organ sizes on bud diameter (as a standard measure of developmental  
206 floral stage; e.g. [21]), and assessed whether there were significant interaction effects between  
207 bud diameter and species, as a measure of differential growth rates. We used *J. darcyana* as the

208 baseline in these analyses to assess differences between ancestral and derived floral forms, and *J.*  
209 *calliantha* as the baseline when comparing the two derived campanulate forms (i.e. *J. calliantha*  
210 versus *J. dendroidea*). All analyses were performed within the R statistical environment [36].

211

## 212 **Results**

### 213 **The early sequence of floral development is similar across *Jaltomata* species**

214 As expected based on their common origin, the five focal species of *Jaltomata* share a common  
215 floral ground plan with each other as well as with the *Solanum* outgroup *S. pimpinellifolium*. All  
216 six species have very similar development up until the 1 mm bud diameter stage. Sepals are the  
217 first floral organs to emerge from the ~0.15 mm diameter floral meristem, and do so in an  
218 asymmetric manner from the abaxial, to adaxial, to lateral sides (Figs. 2a, 3a, 5a-b, 6a, 7a). Once  
219 sepals are approximately the same size and have started to accumulate trichomes, they elongate  
220 from a ring primordium at the base to form a partially fused structure (Figs. 2b, 3b, 4a, 5c, 6b,  
221 7a). At the ~0.25-0.3 mm floral diameter stage, petals and stamens emerge almost  
222 simultaneously, but slightly asymmetrically, followed by gynoecial development by the ~0.5 mm  
223 diameter stage (Figs. 2c-d, 3c, 4b-c, 5d-e, 6c-d, 7b-c). Similar to sepals, petals initially emerge as  
224 free strap-like primordia, but begin to elongate from the congenitally fused region at the base  
225 (just above the stamen attachment point) prior to the ~1 mm diameter bud stage in all species  
226 (Figs. 2e, 3d, 4e-f, 5g, 6g, 7d). Because floral organs initiate at the same developmental stage  
227 across species, observed differences in mature flowers are therefore not a result of differences in  
228 growth onset.

229 Despite these general ontogenetic similarities, specific differences in growth rate are  
230 apparent by the 1 mm stage (Fig. 8). This includes when style elongation is first apparent, which

231 ranges from ~0.8 mm in *S. pimpinellifolium* and *J. sinuosa*, to ~1.5 mm in *J. darcyana* and *J.*  
232 *calliantha*. Relative to all *Jaltomata* species, *S. pimpinellifolium* shows significantly longer  
233 sepals, petals, corolla depth, and stamens (ANOVA  $p < 0.00001$ ; all Tukey HSD,  $p < 0.00001$ ),  
234 and wider ovaries (Tukey HSD,  $p < 0.04$ ) at the 1 to 1.5 mm stage (Figs. 7-8). Among *Jaltomata*  
235 species, differences in sepal and corolla traits are also apparent by the 1 mm bud stage, but are  
236 not associated with rotate vs. campanulate vs. tubular mature floral morphologies (Fig. 1): sepals  
237 are significantly longer in campanulate *J. calliantha* compared to campanulate *J. dendroidea* and  
238 rotate *J. darcyana* (ANOVA  $p < 0.001$ ; Tukey HSD,  $p < 0.001$  and  $p < 0.02$ ), while petals are  
239 longer in *J. calliantha* and tubular *J. umbellata* than *J. dendroidea* (ANOVA  $p < 0.0001$ ; Tukey  
240 HSD,  $p < 0.05$ ) (Fig. 8).

241         Developmental timing of trichome initiation on sepals and petals is similar among all  
242 species. However, qualitative differences become apparent by the 0.3-0.4 mm bud stage (Figs. 2-  
243 7). Trichomes are first initiated on sepals in all species around the 0.2 mm stage, but both simple  
244 (i.e. uniseriate) and non-viscous (i.e. non-secreting) glandular trichomes are apparent on *S.*  
245 *pimpinellifolium* sepals, compared to just simple ones on *Jaltomata* species (Figs. 2a-b, 3a-b, 4a,  
246 5d, 6a-b, 7a). By the 0.3 mm and 0.5 mm stages, dendritic (i.e. branched) trichomes become  
247 apparent on *J. sinuosa*, *J. dendroidea*, and *J. umbellata* sepals, and viscous glandular trichomes  
248 develop on *J. sinuosa* sepals, respectively (Figs. 3c-e, 5e, 6f). Trichomes on petals are initiated  
249 by ~0.5 mm in all species (Figs. 2e, 3d, 4e, 5g, 6f, 7e) but, compared to only simple trichomes in  
250 *Jaltomata* species, both simple and non-viscous glandular trichomes are present on *S.*  
251 *pimpinellifolium* petals by this stage. By the 1.0 mm diameter bud stage (Figs. 2e-f, 5g), dendritic  
252 trichomes in *J. dendroidea* and viscous glandular trichomes in *J. sinuosa*, are present on petals.  
253

254 **Mid stage corolla patterning distinguishes divergent adult *Jaltomata* corolla types**

255 While *S. pimpinellifolium* is conspicuously dissimilar from *Jaltomata* species by the 2 mm stage,  
256 pronounced differences in corolla traits among *Jaltomata* species are not apparent until the 3-5  
257 mm stages (Fig. 8). Furthermore, these corolla trait differences are associated with the divergent  
258 mature corolla forms. Specifically, by the 3 mm stage, petal length, corolla depth, and the extent  
259 of congenital corolla fusion are significantly longer in tubular *J. umbellata* than in all other  
260 *Jaltomata* species (ANOVA  $p < 0.00001$ ; all Tukey HSD,  $p < 0.00001$ ). Further, by this stage  
261 rotate and campanulate species have superficial post-genital corolla fusion via interlocking  
262 trichomes that extends from the region of congenital fusion to petal tips (Figs. 2j-k, 3h-i, 4i).  
263 This is in striking contrast to development of rotate *S. pimpinellifolium* petals that remain only  
264 slightly fused at the base at this stage (Figs. 7j, 8). By the 4 mm stage, the extent of the  
265 congenitally fused corolla region becomes significantly longer in both campanulate species  
266 compared to both rotate species. Finally, by the 5 mm stage, both campanulate-flowered species  
267 also have significantly longer petals and corolla depths relative to the ancestrally rotate *J.*  
268 *darcyana* (ANOVA  $p < 0.0004$ ; Tukey HSD,  $p < 0.001$ ) (Fig. 8).

269 In addition to differences in corolla traits between species with divergent mature corolla  
270 forms, several species-specific differences in other floral traits are apparent during mid-  
271 development stages. For instance, sepals are shortest in rotate *J. darcyana* and longest in  
272 campanulate *J. calliantha* (ANOVA  $p < 0.0001$ ; Tukey HSD,  $p < 0.001$  and  $p < 0.03$ ), stamens  
273 and styles (in addition to petals and corollas) are longest in tubular *J. umbellata* (ANOVA  $p <$   
274  $0.00001$ ; all Tukey HSD,  $p < 0.004$ ), and the ovary is widest in *J. darcyana* (ANOVA  $p <$   
275  $0.00001$ ; Tukey HSD,  $p < 0.05$ ) (Fig. 8).

276

277 **Corolla trait differences between species with similar forms arise during late floral**  
278 **development**

279 For species with similar corolla forms in mature flowers, major species-specific corolla trait  
280 differences only arise during late stages (i.e. after the 5 mm bud stage). The ancestrally rotate  
281 flowers of *J. darcyana* and the ambiguously ancestral or secondarily derived rotate flowers of *J.*  
282 *sinuosa* appear nearly identical up until this stage. Indeed, none of the petal or corolla traits  
283 significantly differ between them until flowers of *J. darcyana* open shortly after the 5 mm stage,  
284 whereas the buds of *J. sinuosa* continue to grow until they open following the 6 mm stage (Table  
285 1). Likewise, corolla traits are very similar between species with campanulate corollas (*J.*  
286 *calliantha* and *J. dendroidea*) until the 5 mm stage (although petals are shorter in *J. dendroidea*  
287 at the 1 mm stage). However, after the 5 mm stage, petal length, corolla depth, and corolla fusion  
288 all become significantly longer in *J. dendroidea* (Tukey HSD,  $p < 0.007$ ;  $p < 0.0001$ ;  $p < 0.007$ ).  
289 Both petal length and corolla depth remain significantly longer in *J. dendroidea* until anthesis;  
290 however, by the 7 mm stage, corolla fusion expands in *J. calliantha* to match that in *J.*  
291 *dendroidea*. Finally, lobe length remains similar in these two species until the 8 mm stage, when  
292 it becomes significantly longer in *J. dendroidea* until anthesis (Tukey HSD,  $p < 0.021$ ).

293

294 **Overall duration of floral development and relative growth rates differ among species**

295 We measured the duration of floral development in days to assess evidence that an extended  
296 growth period underpinned species floral differences, and calculated an average overall growth  
297 rate (bud diameter in mm per day) to assess potential accelerated growth of whole flowers. In  
298 addition, given observed allometric differences in organ sizes among species (Table 3), we also  
299 calculated relative growth rates of individual floral organs. For instance, even if species do not

300 differ in their overall absolute growth rate (diameter per day), differences in the relative growth  
301 rates among floral organs (floral organ in mm per mm of bud diameter) could explain observed  
302 differences in mature flowers.

303 Floral development duration ranged from 14 days in outgroup *S. pimpinellifolium* to 32.4  
304 days in *J. dendroidea* (Table 1). Among *Jaltomata* species, the ancestrally rotate flowers of *J.*  
305 *darcyana* (19.23 days) and derived tubular flowers of *J. umbellata* (18.62 days) had the shortest  
306 development times (ANOVA  $p < 0.00001$ ; Tukey HSD against all other species,  $p < 0.00001$ ;  
307 Tukey HSD against each other,  $p = 0.525$ ). Similarly, overall average bud growth rate (bud  
308 diameter in mm per day) ranged from 0.172 mm/day in *S. pimpinellifolium* to 0.448 mm/day in  
309 campanulate *J. dendroidea* (Table 1). Among *Jaltomata* species, tubular *J. umbellata* had the  
310 slowest overall growth rate at 0.181 mm/day (ANOVA  $p < 0.00001$ ; Tukey HSD,  $p < 0.0004$ ).

311 In addition to species differing in duration of floral development and overall average  
312 growth rate, we also detected several differences in relative growth rates for particular floral  
313 organs. First, growth rates for all measured floral traits (except ovary diameter) were  
314 significantly higher in *S. pimpinellifolium* than in *J. darcyana* (both ancestrally rotate); growth  
315 rates for petals and stamens (which primarily determine the overall size and shape of *S.*  
316 *pimpinellifolium* flowers), and for the style, are significantly higher in *S. pimpinellifolium* than  
317 all *Jaltomata* species except *J. umbellata* (Table 2; Fig. 8). Compared to the ancestrally rotate  
318 flowers in *J. darcyana*, all other *Jaltomata* species have significantly elevated growth rates for  
319 all floral organs except lobe length and ovary diameter. The tubular flowers of *J. umbellata* have  
320 the highest growth rates for corolla depth, corolla fusion, petal length, stamen length, and style  
321 length, while both species with campanulate flowers (*J. calliantha* and *J. dendroidea*) have the

322 next highest growth rates for corolla fusion (and are not statistically different from one another;  $p$   
323 = 0.45) (Table 2).

324

### 325 **Mature floral traits differ markedly across species**

326 Mature, post-anthesis flowers differ substantially in overall size, as well as in relative sizes of  
327 individual organs (Table 3). *Jaltomata calliantha* and *J. dendroidea* have the largest flowers,  
328 while *S. pimpinellifolium* has the smallest; *Jaltomata* flowers also differ from *S. pimpinellifolium*  
329 in having free stamens (compared to a fused anther cone, considered a derived trait in the wild  
330 tomatoes [32]), and in producing nectar. Calyx diameter significantly differs across all species,  
331 while both corolla and ovary diameter significantly differ between all species pairs, except *J.*  
332 *umbellata* versus *S. pimpinellifolium* (ANOVA  $p < 0.00001$ ; Tukey HSD,  $p < 0.0001$ ) which  
333 both have comparatively small flowers. Although floral organ sizes vary substantially amongst  
334 *Jaltomata* species, ancestral rotate flowers of *J. darcyana* have the shortest petals (ANOVA  $p <$   
335  $0.00001$ ; Tukey HSD,  $p < 0.0001$ ), and the smallest amount of corolla fusion (ANOVA  $p <$   
336  $0.00001$ ; Tukey HSD,  $p < 0.00001$ ) (Table 3).

337 In addition to organ size and shape, our focal species also differ in the amount of nectar  
338 produced per flower (ANOVA  $p < 0.00001$ ; Tukey HSD,  $p < 0.0001$ ) (Table 3), and the timing  
339 of nectar secretion. The ancestral rotate species *J. darcyana* produces significantly less nectar  
340 than the four other examined *Jaltomata* species. *Jaltomata darcyana* also produces nectar at the  
341 earliest point during its developmental timeline; minute amounts of nectar are apparent in this  
342 species in mid-day -1 day buds (i.e. the afternoon of the day before anthesis, or flower opening).  
343 In contrast, for *J. calliantha*, *J. dendroidea*, and *J. sinuosa*, nectar is first apparent during the  
344 morning in 0 day buds (i.e. the morning of the day the flower opens, typically a few hours prior

345 to full anthesis); in *J. umbellata*, nectar secretion is not apparent until the evening of day 0  
346 flowers (after anthesis has occurred), or until the morning of +1 day flowers (i.e. the day  
347 following anthesis, just prior to anther dehiscence in this species). Nectar secretion dynamics  
348 therefore appear to have undergone a combination of heterochronic shifts in more derived forms,  
349 including a delayed onset of the start of nectar secretion, as well as increased rates of nectar  
350 production.

351 Finally, mature flowers differ in the types and density of trichomes on mature floral  
352 tissues. From simple to complex: *J. darcyana* has sparse simple (uniseriate) trichomes on both  
353 sepals and petals, *J. calliantha* dense simple trichomes on both sepals and petals, *J. umbellata*  
354 dense simple and dendritic trichomes on sepals but only dense simple ones on petals, *J.*  
355 *dendroidea* very dense dendritic trichomes on both sepals and petals, *S. pimpinellifolium* dense  
356 simple and non-viscous glandular trichomes on both sepals and petals, and *J. sinuosa* very dense  
357 simple, dendritic and viscous glandular trichomes on sepals and dense simple and viscous  
358 glandular ones on petals.

359

## 360 **Discussion**

361 Heterochronic shifts during development are often considered a primary mechanism underlying  
362 phenotypic evolution [6]. Indeed, heterochrony appears to be a common mechanism underlying  
363 morphological diversification in numerous animal lineages [8], as well as in flowers, including  
364 shifts in both duration of floral development and growth rates leading to phenotypic shifts in  
365 descendent lineages [3-4, 13]. In this study, we examined floral ontogeny in five florally diverse  
366 species of *Jaltomata*, as well as a closely related outgroup that shares the ancestral rotate corolla  
367 form, to assess evidence for heterochrony contributing to observed variation in adult corolla



368 forms and other floral traits. We found that early floral development (<1 mm stage) is very  
369 similar among all examined species, that differences between *Jaltomata* and *Solanum* are  
370 apparent by the 2 mm stage, and that corolla trait differences associated with divergent corolla  
371 shapes among *Jaltomata* species first arise during mid-developmental stages (3-5 mm stages).  
372 Elevated growth rates of corolla traits, combined with additional heterochronic and allometric  
373 changes during late development (>5 mm stage), lead to observed differences in mature floral  
374 traits among species (Table 3). Our data are therefore consistent with Darwin's insight that  
375 diversity of form results from changes in later developmental stages [1-2]. In particular, these  
376 developmental changes are heterochronic, with predominately accelerated growth rates and  
377 extended development duration (that is, peramorphic changes) associated with variation in adult  
378 corolla form.

379

380 **Extended duration of floral development and accelerated growth rates underlie derived**  
381 **tubular and campanulate adult corolla shapes in *Jaltomata***

382 One goal of this study was to assess whether derived tubular and campanulate corolla forms in  
383 *Jaltomata* arise due to heterochronic developmental shifts. In particular, we hypothesized that  
384 derived campanulate and tubular forms are elaborated versions of the ancestral rotate form, and  
385 therefore might result from peramorphic changes (i.e. longer duration of floral development or  
386 accelerated growth rates). Indeed, compared to ancestrally rotate flowers of *J. darcyana*, all  
387 derived *Jaltomata* species show peramorphic changes during floral development. First, all  
388 species except *J. umbellata* have significantly longer development duration (Table 1). Because  
389 floral organs initiated at the same developmental stage across species, differences in the duration  
390 of floral development in derived forms result from changes in the timing of offset (i.e. growth

391 period is extended). Second, growth rates for most of our measured floral traits are significantly  
392 elevated in *J. umbellata*, including petal length and extent of corolla fusion (Table 2, even  
393 though *J. darcyana* and *J. umbellata* have similar development periods (19.23 days vs. 18.62  
394 days)). These differences appear to explain how flowers of *J. umbellata* are generally smaller  
395 than those of *J. darcyana*, but nonetheless have significantly longer petals, stamens, and styles,  
396 and greater corolla fusion at anthesis (Table 3). Similarly, growth rates of most floral organs are  
397 significantly elevated in both campanulate species – including rates of petal length and extent of  
398 corolla fusion – in comparison to *J. darcyana* (Table 2), even though both also have longer  
399 development periods and faster overall growth rates in terms of bud diameter (Table 1). Thus,  
400 derived campanulate flowers in *J. calliantha* and *J. dendroidea* result from both accelerated  
401 organ growth rates and an extended development period, while derived tubular flowers in *J.*  
402 *umbellata* appear to result from accelerated growth rates of particular floral organs/features.

403

404 **Alike adult corolla forms result from similar heterochronic changes during mid-stages, but**  
405 **not necessarily during late stages**

406 Another goal of this study was to assess whether similar mature corolla shapes arise from similar  
407 or divergent developmental trajectories. Overall, we found that floral development was very  
408 similar, including nearly identical corolla development, during early and mid-stages within both  
409 species with rotate flowers, suggesting that these forms may share a single evolutionary origin.  
410 In contrast, the two species with campanulate flowers showed similar heterochronic changes in  
411 direction but not in magnitude during mid-stages.

412 Floral ontology in general and corolla development in particular are very similar between  
413 rotate flowers of *J. sinuosa* and ancestrally rotate flowers of *J. darcyana*, until shortly after the 5

414 mm bud stage when anthesis occurs in *J. darcyana*. Indeed, both average overall growth rate and  
415 growth rates for corolla traits do not differ between these species until this stage (Table 1). After  
416 the 5 mm stage, *J. sinuosa* continues to develop for significantly longer (Table 1), and  
417 experiences an elevated growth rate for corolla fusion (Table 2). These data indicate that the  
418 shared rotate floral morphology in these two species arises through a very similar developmental  
419 process, but peramorphic changes (both an extended development period and growth  
420 acceleration) during late floral development lead to an overall increased size of *J. sinuosa*  
421 flowers, and a proportionately greater extent of corolla fusion (Table 3). These observations  
422 again suggest that the rotate flowers in these species share a single evolutionary origin.

423         In contrast, in the two species with campanulate flowers (*J. calliantha* and *J.*  
424 *dendroidea*), both exhibit extended development periods and accelerated growth rates in corolla  
425 traits compared to *J. darcyana*; however, they differ from each other in the magnitude of change  
426 (Tables 2-3). While both show significantly elevated overall rates for corolla depth, corolla  
427 fusion, and petal length, rates for corolla depth and petal length are significantly elevated in *J.*  
428 *dendroidea* compared to *J. calliantha*. Interestingly, *J. calliantha* actually shows a significantly  
429 decreased growth rate (i.e. neoteny) for lobe length compared to *J. darcyana* (Table 2), whereas  
430 the growth rate of lobe length does not significantly differ between *J. dendroidea* and *J.*  
431 *darcyana*. Therefore, both campanulate species have similar corolla trait development until the 5  
432 mm bud stage, including common differences compared to *J. darcyana* during the 3-5 mm  
433 stages, but undergo different heterochronic changes during late development. These changes  
434 include significantly greater corolla fusion in *J. dendroidea* during the 5-7 mm bud stages  
435 (although *overall* rates of corolla fusion are similar between species (Table 2)), as well as  
436 pedomorphosis via neoteny in lobe length growth in *J. calliantha*. These differences, as well as

437 shorter petals in *J. dendroidea* at the 1 mm stage (see above), suggest that campanulate corollas  
438 in these two species are independently derived. Alternatively, these forms could share a single  
439 origin, but could have experienced subsequent developmental changes without large changes in  
440 the mature phenotype (i.e. developmental systems drift) during lineage divergence. In the  
441 absence of other data, we prefer the former hypothesis based on our phylogenetic inference (Wu,  
442 Kostyun, Moyle, unpubl.) (Fig. 1). Together, these observations agree with prior studies  
443 suggesting that different heterochronic changes contributing to similar mature floral phenotypes  
444 may actually be quite common; for instance, multiple distinct developmental shifts have been  
445 shown to produce flowers with the ‘selfing syndrome’ across lineages [3-4, 19] and among  
446 closely related populations and species [37].

447

448 **Heterochronic shifts as a first step to identifying specific mechanisms underlying floral**  
449 **divergence and convergence in *Jaltomata***

450 Our data suggest an important role for several different heterochronic developmental shifts in  
451 generating floral trait diversity among *Jaltomata* species, especially peramorphism (via growth  
452 acceleration and extended growth period), in shaping corolla diversity. If these heterochronic  
453 shifts are caused by relatively simple genetic changes, this could have contributed to the apparent  
454 rapid floral trait diversification within the genus (<5 my; [29]). Future work identifying the  
455 specific genetic and developmental mechanisms underlying these heterochronic shifts will  
456 provide a better understanding of the pace of phenotypic change, as well as likely candidate  
457 genes contributing to these developmental shifts. For instance, changes in the regulation of cell  
458 proliferation and/or cell expansion can lead to variation in overall floral size or size of particular  
459 floral organs, and several key candidate genes have been identified in *Arabidopsis* that function

460 during these processes [19, 38]. Given our observed patterns of developmental heterochrony (i.e.  
461 extended floral development duration and accelerated growth), we anticipate that a combination  
462 of molecular heterochrony (e.g. growth promoting factors are expressed for longer) and  
463 heterometry (e.g. a higher amount of growth promoting gene products are produced) might  
464 underlie these shifts.

465 In addition to intrinsic (genetic) regulation of cell growth within floral organs, external  
466 signals or structures could also influence mature floral morphology [39-40]. For instance, the  
467 involvement of trichomes in regulating flower shape was recently reported in cotton (*Gossypium*  
468 *hirsutum*), in which the petal trichome gene *GhMYB-MIXTA-Like10* (*GhMYBML10*) is strongly  
469 expressed at the point of petal overlap, resulting in trichome cross-linking that physically hold  
470 petals in place [35]. We identified similar superficial corolla fusion via interlocking trichomes in  
471 both rotate and campanulate *Jaltomata* species examined here, although different growth  
472 dynamics during mid- and late-stages was observed between these forms. In particular, in rotate  
473 corollas of *J. darcyana* and *J. sinuosa*, the proportion of the congenitally to post-genitally fused  
474 (via interlocking trichomes) region remains similar throughout mid-stages; in contrast, in  
475 campanulate corollas of *J. calliantha* and *J. dendroidea* the congenitally fused region becomes  
476 proportionately larger during this time. In both rotate and campanulate species however,  
477 trichomes in post-genitally fused regions become unlocked during anthesis, releasing petals,  
478 while congenitally fused regions of the corolla remained fused in mature flowers. Although  
479 trichome cross-linking occurs in these species, it remains to be determined whether it is essential  
480 for normal corolla development (as in [35]) and if this phenotype is regulated by a *MYBML10*  
481 orthologue (including whether expression differs between rotate and campanulate vs. tubular  
482 *Jaltomata* forms).

483           The identification of specific developmental mechanisms and candidate genes will also  
484 clarify whether similar mature floral morphs result from shared evolutionary history or from  
485 convergent or parallel changes at the molecular level. In the *Jaltomata* species that we examined  
486 here, floral development (especially for corolla traits) in both rotate species was extremely  
487 similar until *J. darciana* matured shortly after the 5 mm stage, while in the campanulate species,  
488 we identified heterochronic shifts in the same direction but not of the same magnitude. Thus, it is  
489 likely that *J. darciana* and *J. sinuosa* share their rotate form from common ancestry, while *J.*  
490 *calliantha* and *J. dendroidea* represent convergent or parallel evolution of the campanulate form.  
491 In this way, determining the developmental mechanisms underlying these heterochronic shifts  
492 can be used both to pinpoint how changes in existing floral development pathways lead to  
493 phenotypic variation, and to differentiate alternative evolutionary histories (common ancestry  
494 versus convergence) for similar mature floral forms. In particular, shared mutations would be  
495 more indicative of common descent rather than parallel evolution.

496

#### 497 **Pollinator-mediated selection may have shaped *Jaltomata* floral diversification**

498           Understanding how developmental trajectories differ between species with different  
499 mature floral traits also broadly informs the ways in which these traits are most able to respond  
500 to selection (e.g. whether there is developmental constraint). Such inferences are especially  
501 relevant to floral trait evolution across the *Jaltomata* genus, which shows both high levels of  
502 floral trait divergence, as well as multiple putatively independent shifts to similar floral forms,  
503 within a relatively short timescale (<5mya, [29]). From an evolutionary perspective, such shifts  
504 are likely to have been shaped by pollinator behavior. Observations indicate that some species  
505 are predominantly visited by distinct pollinator functional groups (e.g. hymenopterans vs.

506 hummingbirds, T. Mione, pers. comm.; J.L. Kostyun, unpub.), and these species have floral trait  
507 suites consistent with different pollinator syndromes [41]. In particular, hummingbirds have been  
508 observed visiting campanulate *J. calliantha* and tubular *Jaltomata viridiflora* whose flowers have  
509 copious amounts of dilute nectar, while hymenopterans have been observed visiting *J. sinuosa*  
510 and *Jaltomata repandidentata* (a close relative to *J. darciana*; [30]) that have rotate corollas  
511 with relatively small amounts of concentrated nectar. Because differential pollinator behavior  
512 often leads to reproductive isolation between lineages [42], understanding the underlying  
513 developmental basis of floral trait evolution can also reveal factors that could accelerate  
514 speciation in this rapidly-evolving and florally diverse system.

515

## 516 **Conclusions**

517 As initially proposed by Darwin, much diversity of form (including in flowers) likely results  
518 from changes in late developmental stages. One such type of developmental change is  
519 heterochrony, which is a shift in rate or timing in a descendant compared to its ancestor. By  
520 comparing floral ontogeny among five *Jaltomata* species and an outgroup, we determined that  
521 heterochronic shifts during mid- and late stages of floral development distinguish divergent  
522 corolla forms. In particular, two types of peramorphosis (differential growth acceleration and  
523 delayed offset leading to an extended development period) predominately explain these changes.  
524 Our data therefore support Darwin's insight that even highly divergent mature floral traits result  
525 from modifications to initially similar structures. These relatively simple heterochronic shifts  
526 during later stages of development contribute to observed floral trait variation among *Jaltomata*  
527 species and, as such, could act as a mechanism allowing rapid floral trait diversification in this  
528 florally diverse system.

24

529

530 **Declarations**

531 **Ethics approval and consent to participate**

532 Not applicable.

533

534 **Consent for publication**

535 Not applicable.

536

537 **Availability of data and material**

538 The datasets used and/or analyzed during the current study are available from the corresponding

539 author on reasonable request.

540

541 **Competing interests**

542 The authors declare that they have no competing interests.

543

544 **Funding**

545 This work was supported by a National Science Foundation Graduate Research Fellowship (NSF

546 DEB 1342962) and Amherst College Graduate Fellowship to JLK, a National Science

547 Foundation Award (NSF IOS 1353056) to JCP, and a National Science Foundation Award (NSF

548 DEB 1136707) to LCM. Any opinions, findings, and conclusions or recommendations expressed

549 in this material are those of the author(s) and do not necessarily reflect the views of the National

550 Science Foundation.

551



552 **Authors' contributions**

553 All authors planned and designed the research, JLK performed the experiments, JLK and JCP  
554 analyzed the data, and all wrote the manuscript. All authors read and approved the final  
555 manuscript.

556

557 **Acknowledgements**

558 We thank Armin Moczek for providing feedback on a previous draft of this manuscript, Barry  
559 Stein of the IU Electron Microscopy Center and Michele von Turkovich of the UVM  
560 Microscopy Imaging Center for SEM and other instrument training, the IU Greenhouse staff for  
561 plant care, and Thomas Mione for sharing seed material.

562

563 **References**

- 564 1. Darwin C. On the Origin of species by means of natural selection, or, the preservation of  
565 favoured races in the struggle for life. London: J. Murray; 1859.
- 566 2. Friedman WE, Diggle PK. Charles Darwin and the origins of plant evolutionary  
567 developmental biology. *Plant Cell* 2011; 23:1194-1207.
- 568 3. Li P, Johnston MO. Heterochrony in plant evolutionary studies through the twentieth century.  
569 *Botanical Review* 2000; 66:57-88.
- 570 4. Box MS, Glover BJ. A plant developmentalist's guide to paedomorphosis: reintroducing a  
571 classic concept to a new generation. *Trends Plant Sci* 2010; 15:241-246.
- 572 5. Haeckel E. Die Gastrula and die Eifurchung der Thiere. *Jena Z. Naturwiss* 1875; 9:402-508.
- 573 6. Gould SJ. *Ontogeny and phylogeny*. Cambridge, MA: Harvard University Press; 1977.
- 574 7. Gould SJ. *Ontogeny and phylogeny: revisited and reunited*. *BioEssays* 1992; 14:275-279.

- 575 8. McNamara KJ. Heterochrony: the evolution of development. *Evo Edu Outreach* 2012; 5:203-  
576 218.
- 577 9. Wayne RK. Cranial morphology of domestic and wild canids: the influence of development on  
578 morphological change. *Evolution* 1986; 40:243-261.
- 579 10. Truman JW, Riddiford LM. The origins of insect metamorphosis. *Nature* 1999; 401:447-452.
- 580 11. Cartolano M, Pieper B, Lempe J, Tattersall A, Huijser P, Tresch A, Darrah PR, Hay A,  
581 Tsiantis M. Heterochrony underpins natural variation in *Cardamine hirsuta* leaf form.  
582 *Proc Natl Acad Sci USA* 2015; 112:10539-10544.
- 583 12. Lemmon ZH, Park SJ, Jiang K, Van Eck J, Schatz MC, Lippman ZB. The evolution of  
584 inflorescence diversity in the nightshades and heterochrony during meristem maturation.  
585 *Genome Res* 2016; 26:1676-1686.
- 586 13. Geuten K, Coenen H. Heterochronic genes in plant evolution and development. *Front Plant*  
587 *Sci* 2013; 4:381.
- 588 14. Endress PK. Evolutionary diversification of the flowers in angiosperms. *Am J Bot* 2011;  
589 98:370-396.
- 590 15. Angiosperm Phylogeny Group, The. An update of the Angiosperm Phylogeny Group  
591 classification for the orders and families of flowering plants: APG IV. *Bot J Linn Soc*  
592 2016; 181:1-20.
- 593 16. Stebbins GL. Self fertilization and population variability in the higher plants. *Am Nat* 1957;  
594 91:337-354.
- 595 17. Stebbins GL. Adaptive radiation of reproductive characteristics in angiosperms, I: Pollination  
596 mechanisms. *Annu Rev Ecol Evol Syst* 1970; 1:307-326.

- 597 18. Barrett SCH, Harder LD. Floral variation in *Eichhornia paniculata* (Spreng) Solms  
598 (Pontederiaceae). 2. Effects of development and environment on the formation of selfing  
599 flowers. J Evol Biol 1992; 5:83-107.
- 600 19. Sicard A, Lenhard M. The selfing syndrome: a model for studying the genetic and  
601 evolutionary basis of morphological adaptation in plants. Ann Bot 2011; 107:1433-1443.
- 602 20. Li P, Johnston MO. Comparative floral morphometrics of distyly and homostyly in three  
603 evolutionary lineages of *Amsinckia* (Boraginaceae). Canadian Journal of Botany 2001;  
604 79:1332-1348.
- 605 21. Georgiady MS, Lord EM. Evolution of the inbred flower form in the currant tomato,  
606 *Lycopersicon pimpinellifolium*. Int J Plant Sci 2002; 163:531-541.
- 607 22. Minter TC, Lord EM. A comparison of cleistogamous and chasmogamous floral  
608 development in *Collomia grandiflora* Dougl ex Lindl (Polemoniaceae). Am J Bot 1983;  
609 70:1499-1508.
- 610 23. Runions CJ, Geber MA. Evolution of the self-pollinating flower in *Clarkia xantiana*  
611 (Onagraceae). I. Size and development of floral organs. Am J Bot 2000; 87:1439-1451.
- 612 24. Li P, Johnston MO. Flower development and the evolution of self-fertilization in *Amsinckia*:  
613 The role of heterochrony. Evol Biol 2010; 37:143-168.
- 614 25. Box MS, RM Bateman, BJ Glover, Rudall PJ. Floral ontogenetic evidence of repeated  
615 speciation via paedomorphosis in subtribe Orchidinae (Orchidaceae). 2008; Bot J Linn  
616 Soc 157:429-454.
- 617 26. Armbruster WS, J Lee, ME Edwards, Baldwin BG. Floral paedomorphy leads to secondary  
618 specialization in pollination of Madagascar *Dalechampia* (Euphorbiaceae). Evolution  
619 2013; 67:1196-1203.

- 620 27. Guerrant EO. Neotenic evolution of *Delphinium nudicaule* (Ranunculaceae) - a  
621 hummingbird-pollinated larkspur. *Evolution* 1982; 36:699-712.
- 622 28. Olmstead RG, L Bohs, HA Migid, E Santiago-Valentin, VF Garcia, Collier SM. A molecular  
623 phylogeny of the Solanaceae. *Taxon* 2008; 57:1159-1181.
- 624 29. Sarkinen T, L Bohs, RG Olmstead, Knapp S. A phylogenetic framework for evolutionary  
625 study of the nightshades (Solanaceae): a dated 1000-tip tree. *BMC Evol Biol* 2013;  
626 13:214.
- 627 30. Miller RJ, T Mione, HL Phan, Olmstead RG. Color by numbers: nuclear gene phylogeny of  
628 *Jaltomata* (Solanaceae), sister genus to *Solanum*, supports three clades differing in fruit  
629 color. *Syst Botany* 2011; 36:153-162.
- 630 31. Hansen DM, JM Olesen, T Mione, SD Johnson, Muller CB. Coloured nectar: distribution,  
631 ecology, and evolution of an enigmatic floral trait. *Biological Reviews* 2007; 82:83-111.
- 632 32. Knapp S. On 'various contrivances': pollination, phylogeny and flower form in the  
633 Solanaceae. *Phil Trans R Soc B* 2010; 365:449-460.
- 634 33. Xiao H, C Radovich, N Welty, J Hsu, DM Li, T Meulia, van der Knaap E. Integration of  
635 tomato reproductive developmental landmarks and expression profiles, and the effect of  
636 SUN on fruit shape. *BMC Plant Biol* 2009; 9:49.
- 637 34. Schneider CA, WS Rasband, Eliceiri KW. NIH Image to ImageJ: 25 years of image analysis.  
638 *Nature Methods* 2012; 9:671-675.
- 639 35. Tan J, Walford S-A, Dennis ES, Llewellyn D. Trichomes control flower bud shape by linking  
640 together young petals. *Nature Plants* 2016; 2:16093.
- 641 36. R Core Team. R: A language and environment for statistical computing. R Foundation for  
642 Statistical Computing, Vienna, Austria. 2015. <https://www.R-project.org/>.

- 643 37. Summers HE, SM Hartwick, Raguso RA. Geographic variation in floral allometry suggests  
644 repeated transitions between selfing and outcrossing in a mixed mating plant. *Am J Bot*  
645 2015; 102:745-757.
- 646 38. Krizek BA, Anderson JT. Control of flower size. *J Exp Bot* 2013; 64:1427-1437.
- 647 39. Gilbert SF. Ecological developmental biology: environmental signals for normal animal  
648 development. *Evol Dev* 2012; 14:20-28.
- 649 40. Sampathkumar A, Yan A, Krupinski P, Meyerowitz EM. Physical forces regulate plant  
650 development and morphogenesis. *Curr Biol* 2014; 24:R475-R483.
- 651 41. Fenster CB, WS Armbruster, P Wilson, MR Dudash, Thomson JD. Pollination syndromes  
652 and floral specialization. *Annu Rev Ecol Evol Syst* 2004; 35:375-403.
- 653 42. Kay KM, Sargent RD. The role of animal pollination in plant speciation: integrating ecology,  
654 geography, and genetics. *Annu Rev Ecol Evol Syst* 2009; 40:637-656.
- 655 43. Kostyun JL, Moyle LC. Multiple strong postmating and intrinsic postzygotic reproductive  
656 barriers isolate florally diverse species of *Jaltomata* (Solanaceae). *Evolution* 2017;  
657 71:1556-1571.

658  
659

## 660 **Figure legends**

661 **Fig. 1.** Simplified phylogenetic relationships in *Jaltomata* and the outgroup *Solanum*  
662 *pimpinellifolium* based on [30, 43] and (Wu, Kostyun, Moyle, unpubl.). Representative mature  
663 flowers are depicted for the species examined here (in bold font). White scale bars = 1 cm. R,  
664 rotate; C, campanulate; T, tubular.

665

666 **Fig. 2.** *Jaltomata darcyana* rotate flower development. (a-b) Sepals develop asymmetrically  
667 from the abaxial side, and once of similar lengths, grow from a basal ring meristem to form a  
668 fused tube. (c) Removal of sepals reveals simultaneous development of petal and stamen  
669 primordia. (d-e) Petals grow freely as stamen thecae become differentiated. (f-g) Carpels become  
670 fused during gynoecial development. (h-k) Petals are congenitally fused at the base just above  
671 the stamen insertion point (i), but then become superficially and postgenitally fused via  
672 interlocking trichomes along their lengths by the 3.5 mm flower diameter stage. Scale bars = 100  
673  $\mu\text{m}$ .

674

675 **Fig. 3.** *Jaltomata sinuosa* rotate flower development. (a-b) Sepals initiate in an asymmetric  
676 fashion from the abaxial side, and quickly fuse at the base. (c) Five free petals develop around  
677 initiating stamen primordia. (d-e) As anther thecae differentiate, petals remain mostly free, but  
678 are fused at the base. (f-g) Removal of mostly free petals reveals development of fused carpels.  
679 (h-i) Opening of the corolla in 2.5-4 mm wide flowers shows a fused petal base from just above  
680 the stamen attachment point to about mid-way up the length of the corolla (i), and superficial  
681 fusion of petals above the mid-point, post-genitally via interlocking trichomes. Scale bars = 100  
682  $\mu\text{m}$ .

683

684 **Fig. 4.** *Jaltomata calliantha* campanulate flower development. (a) Free sepals extend through the  
685 growth of a basal ring primordium to form a lower fused tube. (b) Opening of partially fused  
686 sepals reveals initiation of petal, followed by stamen, primordia. (c) Free petals and stamens  
687 grow simultaneously prior to initiation of the carpel primordia. (d-f) Free petals develop  
688 trichomes on the adaxial side, becoming slightly fused just above the stamen attachment point

689 during stamen thecae emergence. (g-h) Fused carpel development. (i) Petals remain only slightly  
690 congenitally fused above the stamen filament in 3.5 mm wide flowers (corolla was opened prior  
691 to fixation, so superficial fusion via trichomes is not visible). Scale bars = 100  $\mu\text{m}$ .

692

693 **Fig. 5.** *Jaltomata dendroidea* campanulate flower development. (a-b) Sepals develop  
694 asymmetrically from the abaxial side. (c) Once equal in size, sepals extend through growth of the  
695 underlying ring meristem, giving rise to a fused tube. (d-e) Partial removal of sepals reveals  
696 simultaneous development of petals and stamens. (f-h) Petals are largely free from early  
697 development to the stamen thecae differentiation stage in 1.6 mm wide flowers, however, there is  
698 a small zone of fusion above the stamen attachment point. (i) Carpels are partially fused above  
699 the developing ovary. Scale bars = 100  $\mu\text{m}$ .

700

701 **Fig. 6.** *Jaltomata umbellata* tubular flower development. (a) Sepal development occurs  
702 asymmetrically, with the first sepal initiating on the abaxial side. (b) Once all sepal primordia  
703 have expanded, organs become fused at the base to form a tube. (c-d) Removal of partially fused  
704 sepals reveals the simultaneous initiation of petal and stamen primordia in an asymmetric  
705 progression. (e-g) Separate petal primordia elongate without fusion until differentiation of  
706 stamen thecae. (h-k) As stamen thecae differentiate, petals of ~1-3 mm diameter flowers become  
707 increasingly fused above the stamen attachment point to form a corolla tube. (l-m) Carpel  
708 development, including formation of the disk nectary by ~2 mm diameter buds. Scale bars = 100  
709  $\mu\text{m}$ .

710

711 **Fig. 7.** *Solanum pimpinellifolium* rotate flower development. (a) Sepals develop asymmetrically  
712 and fuse at their base to form a fused ring. (b-c) Removal of sepals reveals simultaneous  
713 development of petals and stamens, followed by carpel development (c). (d-h) Petals are fused at  
714 the base above the stamen attachment point (visible in g) from early development (d), however,  
715 most of the petal margin is free. (i) Late carpel development. (j) At the 2 mm flower diameter  
716 stage, when anther thecae are well established, petals are mostly free, but remain partially fused  
717 at the base. Scale bars = 100  $\mu$ m.

718

719 **Fig. 8.** Growth trajectories for the focal floral organs and features. For all panels, the x-axis is  
720 bud diameter (mm) and the y-axis is the focal organ (mm). Each species is color coded.

721

#### 722 **Additional files**

723 **Additional file 1: Table S1.** Accessions of the species used in the present study and their  
724 collection locations. All *Jaltomata* seed material provided by Dr. Thomas Mione at Central  
725 Connecticut State University (CCSU); *S. pimpinellifolium* seed provided by the Tomato Genetics  
726 Resource Center at UC Davis. Additional file 1 is in .docx format.

727

728 **Additional file 2: Figure S1.** Measured morphological traits on mature flowers. Floral organs  
729 were measured on three flowers per individual, for at least three individuals per species, using  
730 hand-held digital calipers to the nearest 0.01 mm. Additional file 2 is in .pdf format.



731 **Table 1.** Average length of development, size of -1 day buds (day before anthesis), and overall bud growth rates for the 5 *Jaltomata*  
 732 species and *Solanum pimpinellifolium*.

| Species                          | Length (days)      | -Day Bud Diameter (mm) | Growth rate (mm/day) |
|----------------------------------|--------------------|------------------------|----------------------|
| <i>J. darcyana</i> (n=13)        | 19.23 <sup>a</sup> | 4.52 <sup>a</sup>      | 0.236 <sup>a</sup>   |
| <i>J. sinuosa</i> (n=11)         | 28.55 <sup>b</sup> | 6.36 <sup>b</sup>      | 0.223 <sup>a</sup>   |
| <i>J. calliantha</i> (n=10)      | 28.80 <sup>b</sup> | 11.35 <sup>c</sup>     | 0.395 <sup>b</sup>   |
| <i>J. dendroidea</i> (n=5)       | 32.40 <sup>c</sup> | 14.50 <sup>d</sup>     | 0.448 <sup>c</sup>   |
| <i>J. umbellata</i> (n=13)       | 18.62 <sup>a</sup> | 3.37 <sup>e</sup>      | 0.181 <sup>d</sup>   |
| <i>S. pimpinellifolium</i> (n=8) | 14.00 <sup>d</sup> | 2.41 <sup>f</sup>      | 0.172 <sup>d</sup>   |

733 Bud diameter was measured every other day, from 1 mm buds to anthesis. Significant differences among species are indicated by different letters (following  
 734 ANOVA and Tukey's HSD).

735

736

737

738

739

740

741

743 **Table 2.** Relative growth rates for focal floral organs and features for the examined species, measured against bud diameter.

|                       | <i>J. darcyana</i> (100) |           | <i>J. sinuosa</i> (88) |           | <i>J. calliantha</i> (66) |            | <i>J. dendroidea</i> (85) |            | <i>J. umbellata</i> (96) |           | <i>S. pimpinellifolium</i> (106) |           |
|-----------------------|--------------------------|-----------|------------------------|-----------|---------------------------|------------|---------------------------|------------|--------------------------|-----------|----------------------------------|-----------|
|                       | Slope                    | Intercept | Slope                  | Intercept | Slope                     | Intercept  | Slope                     | Intercept  | Slope                    | Intercept | Slope                            | Intercept |
| <b>Sepal Length</b>   | 0.826                    | 0.043     | 0.967***               | -0.002*   | 1.159***                  | 0.013^     | 0.948***^^^               | 0.013^     | 1.153***                 | -0.083*** | 0.960**                          | 0.061     |
| <b>Corolla Depth</b>  | 0.906                    | -0.024    | 1.012*                 | -0.063    | 1.032*                    | -0.173***^ | 1.225***^^^               | -0.173***^ | 1.881***                 | -0.423*** | 1.651***                         | -0.253*** |
| <b>Corolla Fusion</b> | 0.522                    | 0.085     | 0.887***               | -0.071*** | 1.015***                  | -0.166***  | 1.067***                  | -0.166***  | 1.652***                 | -0.386*** | 0.767**                          | 0.015     |
| <b>Lobe Length</b>    | 0.734                    | 0.049     | 0.683                  | 0.069     | 0.537***                  | 0.037^^^   | 0.721^^^                  | 0.037^^^   | 0.795                    | 0.029     | 1.354***                         | -0.143*** |
| <b>Petal Length</b>   | 1.005                    | -0.060    | 1.149**                | -0.122*   | 1.129*                    | -0.183***  | 1.244***^                 | -0.183***  | 1.873***                 | -0.418*** | 1.633***                         | -0.239*** |
| <b>Stamen Length</b>  | 0.722                    | 0.035     | 0.863**                | -0.027*   | 0.928***                  | -0.009^    | 0.815***^                 | -0.009^    | 1.577***                 | -0.320*** | 1.540***                         | -0.232*** |
| <b>Ovary Diameter</b> | 0.551                    | 0.107     | 0.449***               | 0.152*    | 0.667***                  | 0.116^^^   | 0.524^^^                  | 0.116^^^   | 0.519                    | 0.112     | 0.387***                         | 0.177**   |
| <b>Style Length</b>   | 0.481                    | 0.116     | 0.802*                 | -0.031    | 0.896***                  | -0.160***  | 1.059***                  | -0.160***  | 1.747***                 | -0.408*** | 1.684***                         | -0.330*** |

744 Measurements were log-transformed prior to analysis. Significant differences against *J. darcyana* (ancestral rotate) indicated by \* (\* p < 0.05; \*\* p < 0.001; \*\*\*745 p < 0.0001); significant differences between *J. calliantha* and *J. dendroidea* (campanulate) indicated by ^ (^ p < 0.05; ^^ p < 0.001; ^^ p < 0.0001).

746

747

748

749

750

751

752

753

754

755

756

757

758

759 **Table 3.** Mature floral trait means for the five included *Jaltomata* species and *Solanum pimpinellifolium*.

|                           | <i>J. darciana</i> (7) |      | <i>J. sinuosa</i> (7) |      | <i>J. calliantha</i> (7) |      | <i>J. dendroidea</i> (3) |      | <i>J. umbellata</i> (5) |      | <i>S. pimpinellifolium</i> (5) |      |
|---------------------------|------------------------|------|-----------------------|------|--------------------------|------|--------------------------|------|-------------------------|------|--------------------------------|------|
|                           | Mean                   | SD   | Mean                  | SD   | Mean                     | SD   | Mean                     | SD   | Mean                    | SD   | Mean                           | SD   |
| Calyx Diameter (mm)       | 11.88 <sup>a</sup>     | 0.37 | 15.49 <sup>b</sup>    | 0.40 | 33.88 <sup>c</sup>       | 1.21 | 19.69 <sup>d</sup>       | 1.74 | 8.14 <sup>e</sup>       | 1.63 | 5.77 <sup>f</sup>              | 0.43 |
| Sepal Length (mm)         | 6.32 <sup>a</sup>      | 0.16 | 7.48 <sup>b</sup>     | 0.25 | 18.01 <sup>c</sup>       | 1.10 | 9.67 <sup>d</sup>        | 0.80 | 4.41 <sup>e</sup>       | 0.73 | 3.45 <sup>f</sup>              | 0.23 |
| Corolla Diameter (mm)     | 20.48 <sup>a</sup>     | 2.18 | 29.82 <sup>b</sup>    | 2.27 | 27.48 <sup>c</sup>       | 3.48 | 35.35 <sup>d</sup>       | 3.27 | 15.32 <sup>e</sup>      | 2.52 | 15.58 <sup>e</sup>             | 0.58 |
| Corolla Depth (mm)        | 0.77 <sup>a</sup>      | 0.09 | 1.38 <sup>a</sup>     | 0.27 | 15.57 <sup>b</sup>       | 1.84 | 12.72 <sup>c</sup>       | 0.88 | 10.25 <sup>d</sup>      | 2.27 | 0.45 <sup>a</sup>              | 0.07 |
| Corolla Fusion (mm)       | 3.96 <sup>a</sup>      | 0.28 | 9.45 <sup>b</sup>     | 0.46 | 15.64 <sup>c</sup>       | 0.44 | 14.91 <sup>c</sup>       | 3.78 | 10.33 <sup>b</sup>      | 1.22 | 1.60 <sup>d</sup>              | 0.25 |
| Corolla Fusion Proportion | 0.42 <sup>a</sup>      | 0.07 | 0.64 <sup>b</sup>     | 0.05 | 0.86 <sup>c</sup>        | 0.08 | 0.65 <sup>b</sup>        | 0.10 | 0.72 <sup>b</sup>       | 0.08 | 0.21 <sup>d</sup>              | 0.03 |
| Lobe Length (mm)          | 5.48 <sup>a</sup>      | 1.42 | 5.40 <sup>a</sup>     | 0.70 | 2.77 <sup>b</sup>        | 1.83 | 7.65 <sup>c</sup>        | 0.66 | 4.08 <sup>a</sup>       | 0.96 | 5.97 <sup>a</sup>              | 0.11 |
| Petal Length (mm)         | 9.53 <sup>a</sup>      | 1.39 | 14.85 <sup>b</sup>    | 1.04 | 18.41 <sup>c</sup>       | 1.92 | 22.56 <sup>d</sup>       | 2.98 | 14.40 <sup>b</sup>      | 0.81 | 7.57 <sup>e</sup>              | 0.22 |
| Stamen Length (mm)        | 4.76 <sup>a</sup>      | 0.38 | 10.80 <sup>b</sup>    | 0.60 | 10.48 <sup>b</sup>       | 1.00 | 10.94 <sup>b</sup>       | 0.35 | 10.45 <sup>b</sup>      | 0.57 | 6.15 <sup>c</sup>              | 0.09 |
| Anther Length (mm)        | 1.43 <sup>a</sup>      | 0.10 | 1.59 <sup>b</sup>     | 0.10 | 3.27 <sup>c</sup>        | 0.19 | 1.86 <sup>d</sup>        | 0.05 | 1.34 <sup>a</sup>       | 0.15 | 5.75 <sup>e</sup>              | 0.12 |
| Ovary Diameter (mm)       | 1.78 <sup>a</sup>      | 0.14 | 2.28 <sup>b</sup>     | 0.19 | 5.30 <sup>c</sup>        | 0.41 | 3.15 <sup>d</sup>        | 0.18 | 1.37 <sup>e</sup>       | 0.26 | 1.12 <sup>e</sup>              | 0.06 |
| Style Length (mm)         | 4.79 <sup>a</sup>      | 0.53 | 7.90 <sup>b</sup>     | 0.73 | 8.38 <sup>b</sup>        | 0.66 | 12.74 <sup>c</sup>       | 0.86 | 14.64 <sup>d</sup>      | 1.47 | 5.45 <sup>a</sup>              | 0.21 |
| Herkogamy (mm)            | 1.47 <sup>a</sup>      | 0.14 | -2.20 <sup>b</sup>    | 0.19 | 5.19 <sup>c</sup>        | 0.75 | 4.85 <sup>c</sup>        | 0.35 | 5.37 <sup>c</sup>       | 2.14 | -0.08 <sup>d</sup>             | 0.12 |
| Nectar Volume (μl)        | 2.19 <sup>a</sup>      | 0.48 | 6.86 <sup>b</sup>     | 1.31 | 50.62 <sup>c</sup>       | 3.76 | 32.89 <sup>d</sup>       | 7.03 | 17.80 <sup>e</sup>      | 3.84 | 0.00 <sup>a</sup>              | 0.00 |

760 Sample sizes in parentheses refer to the number of individuals measured (at least three flowers per individual). Significant differences among species are  
761 indicated by different letters ( $p < 0.001$ , ANOVA and Tukey's HSD). *Jaltomata* data from [43].

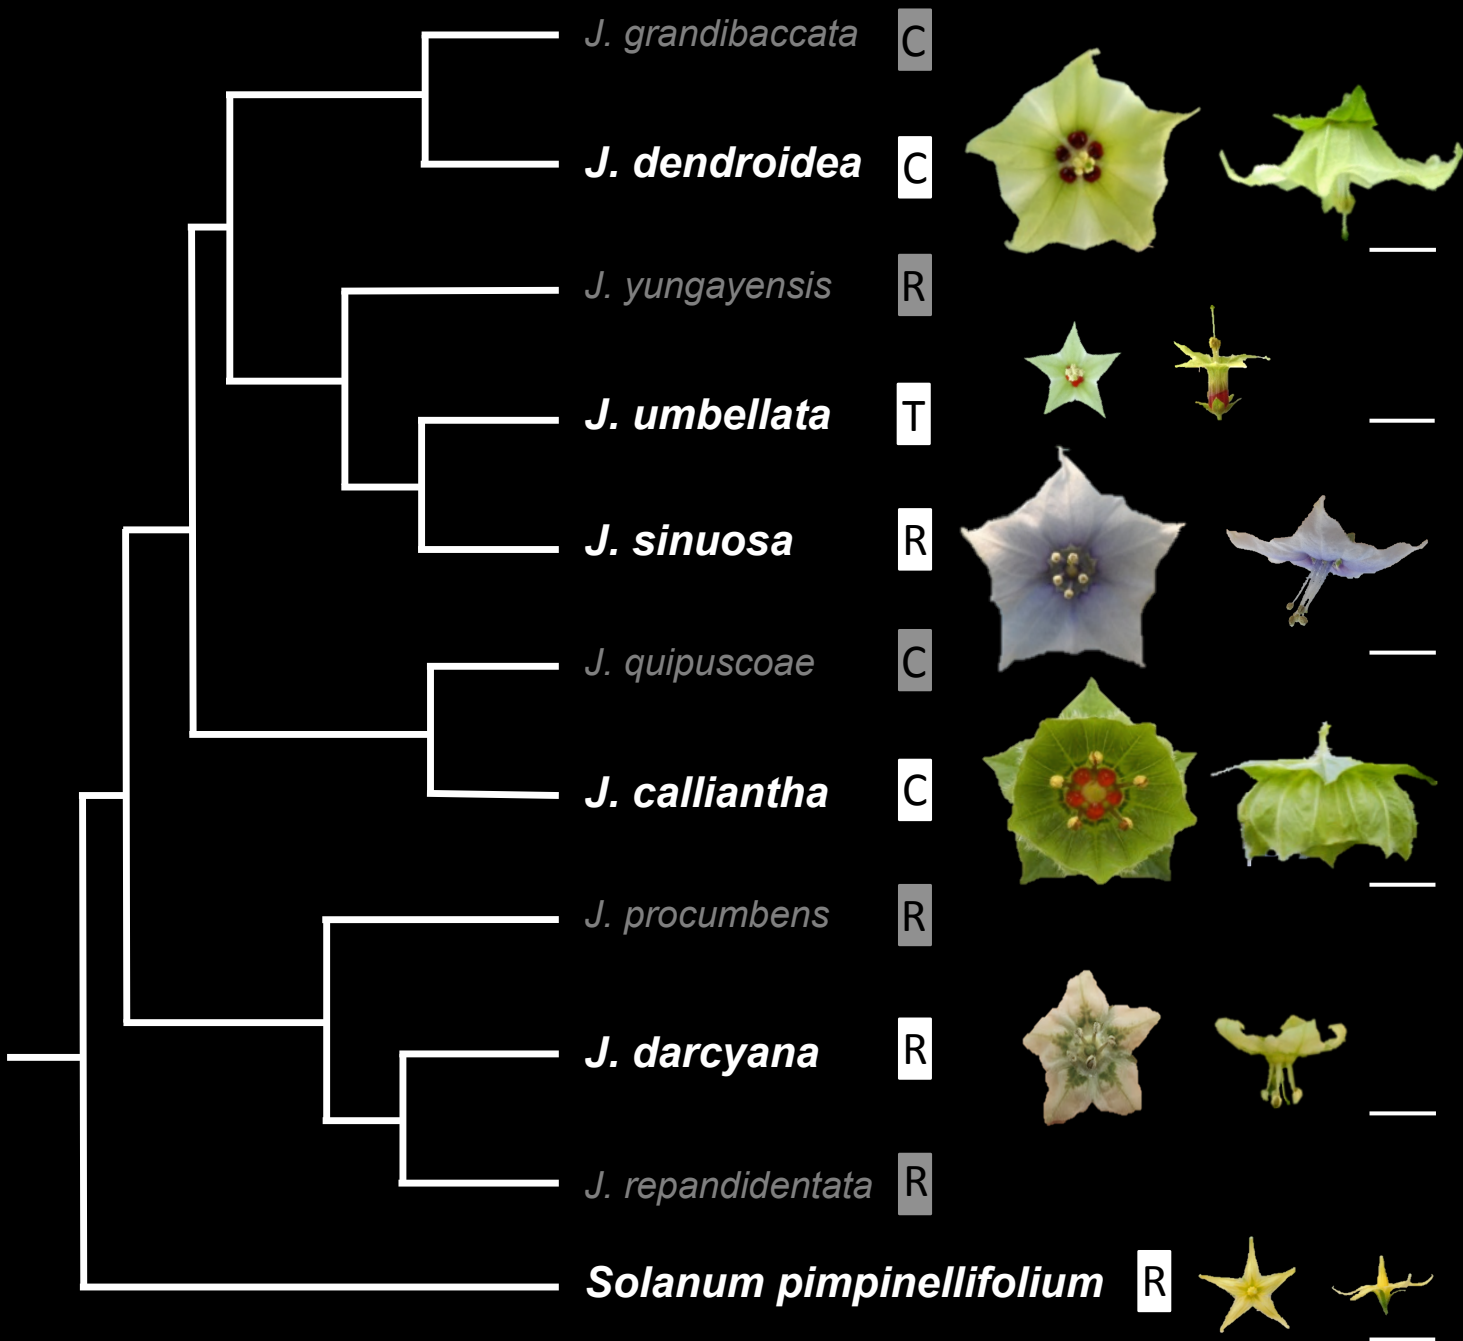

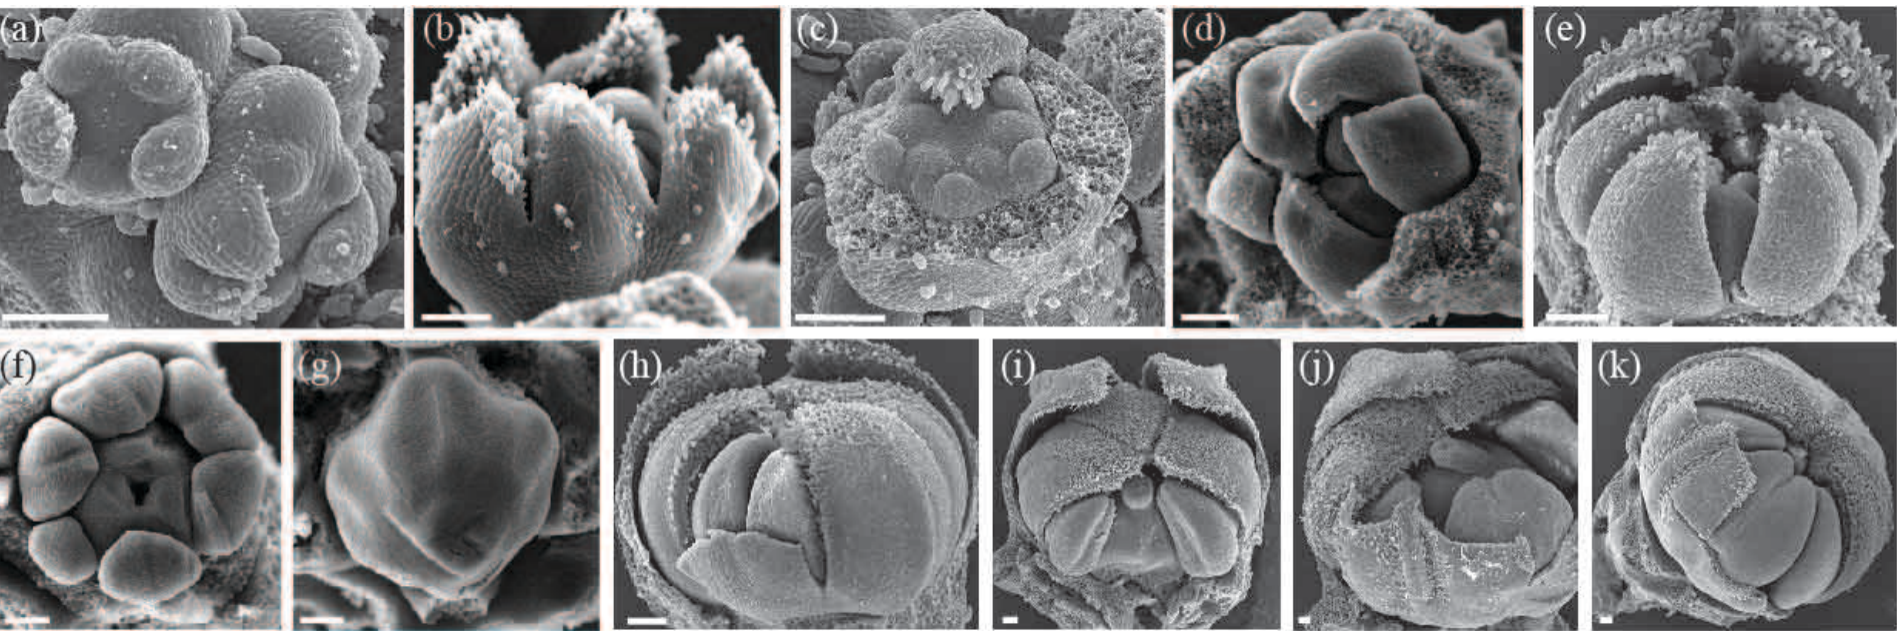

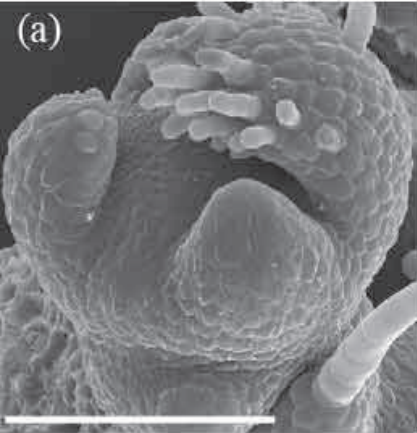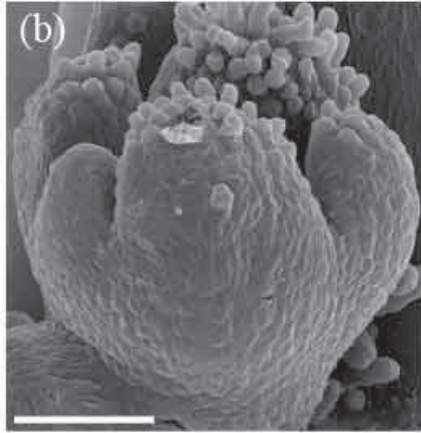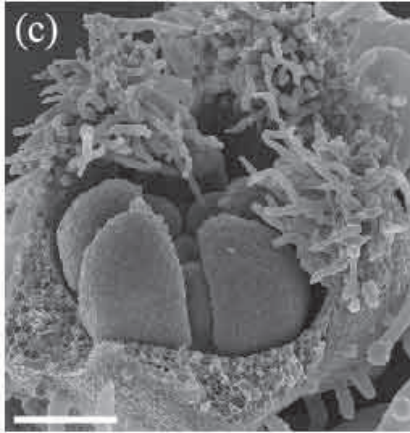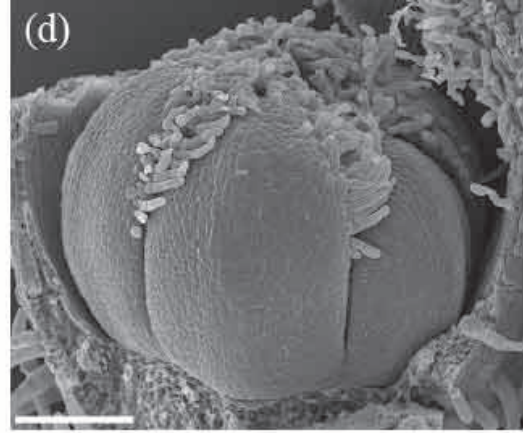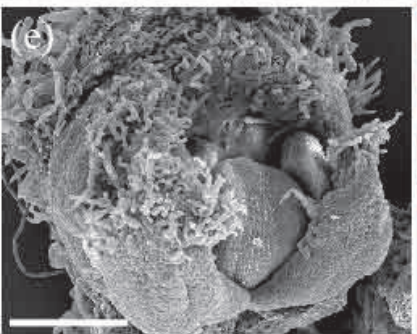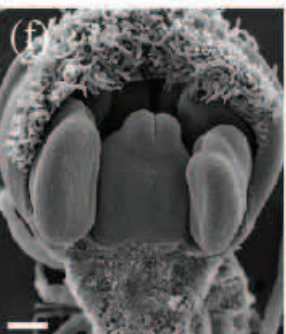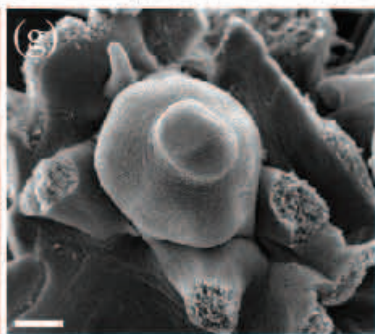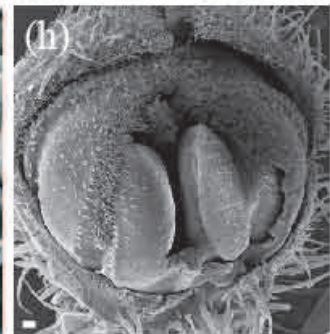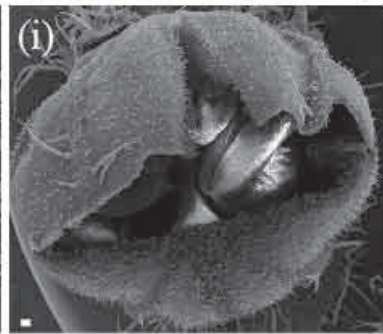

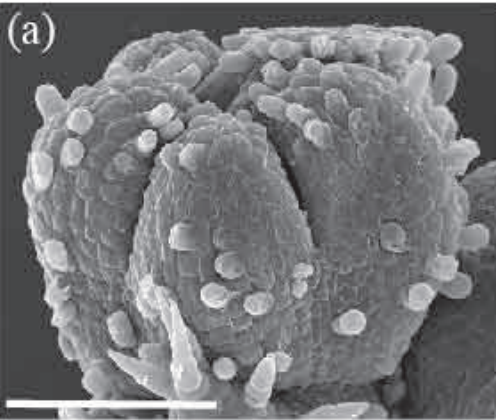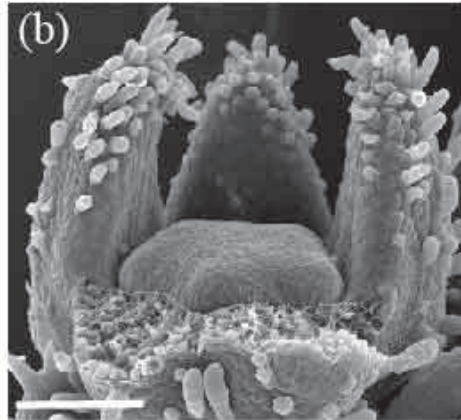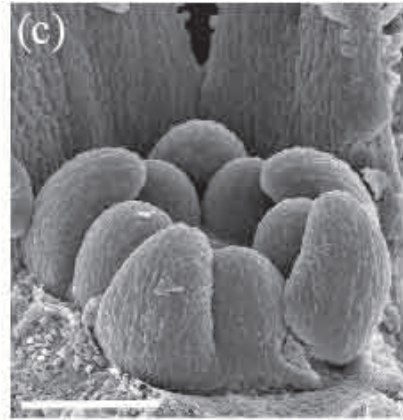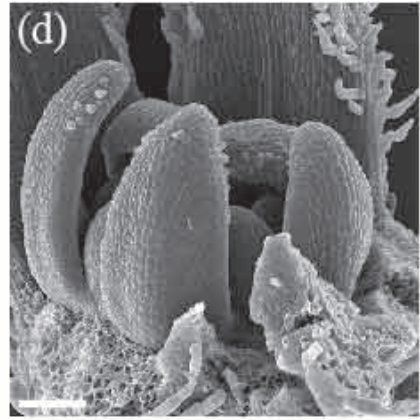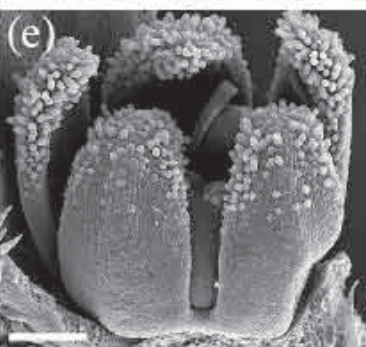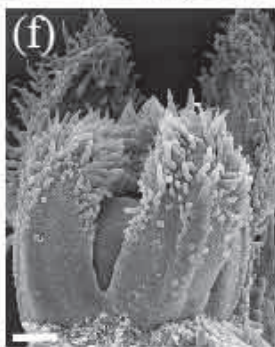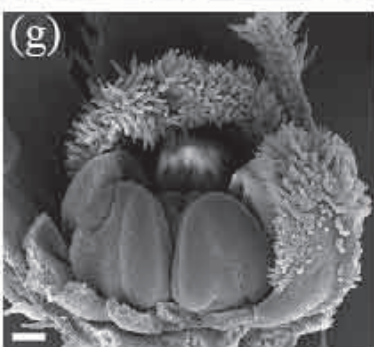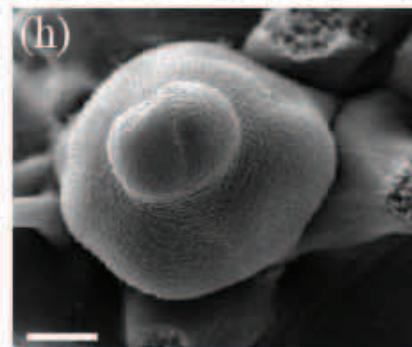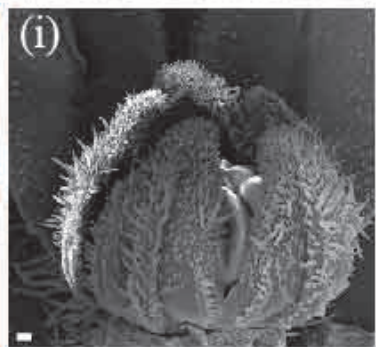

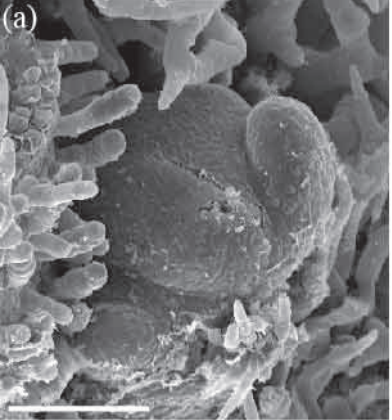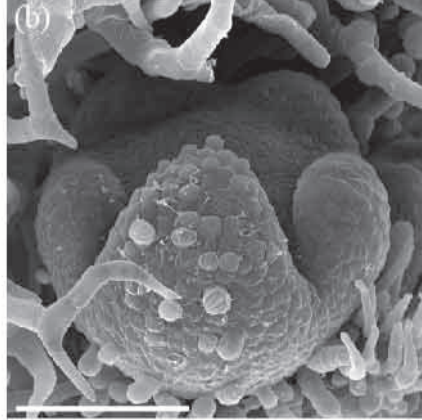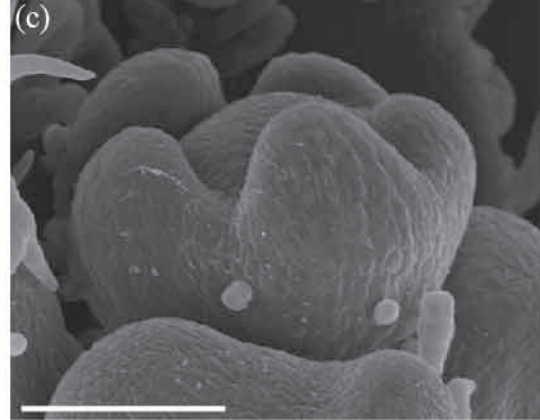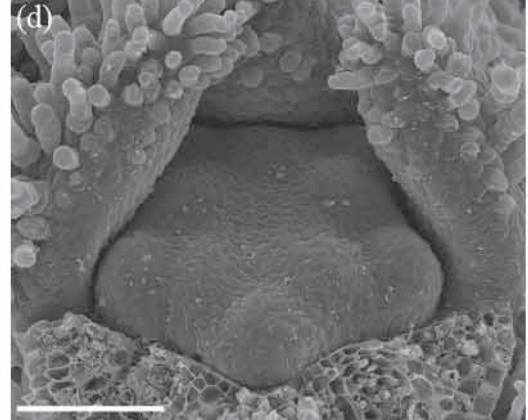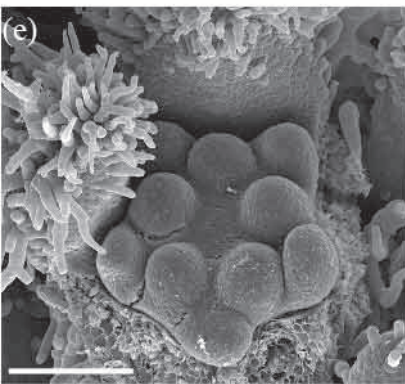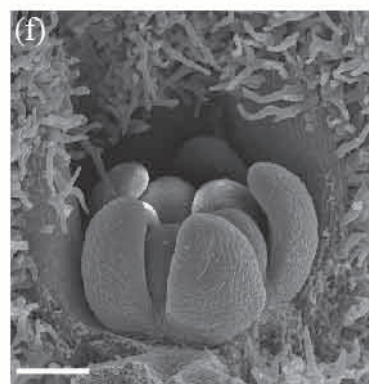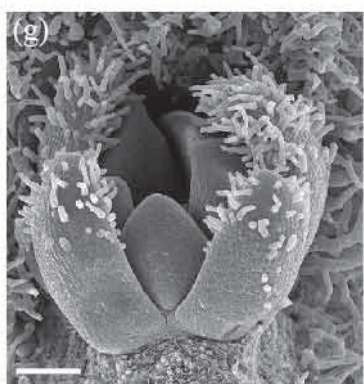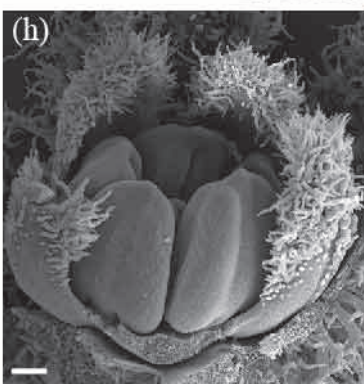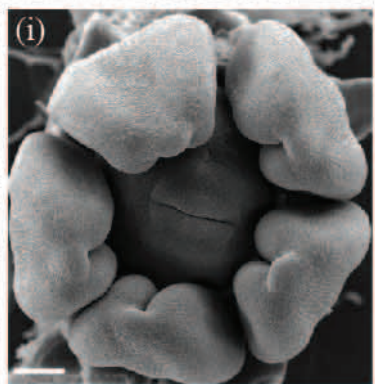



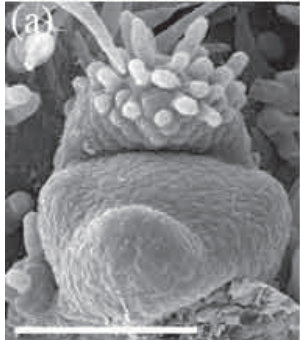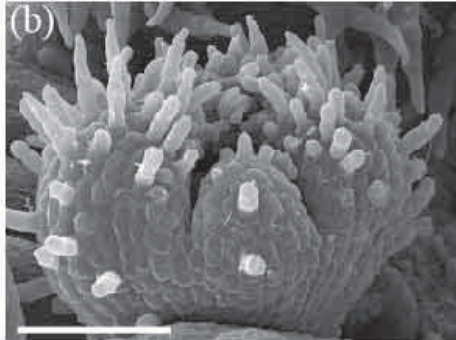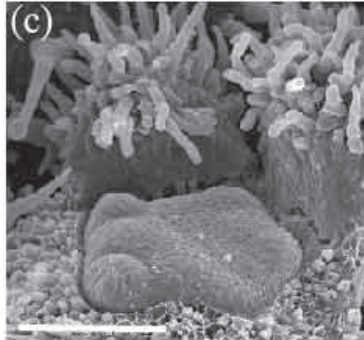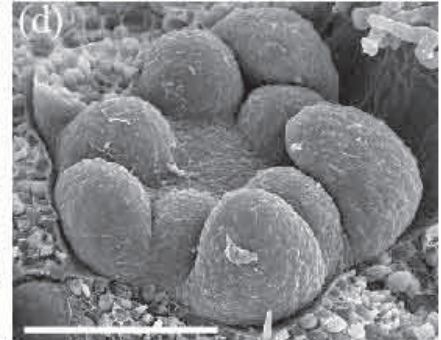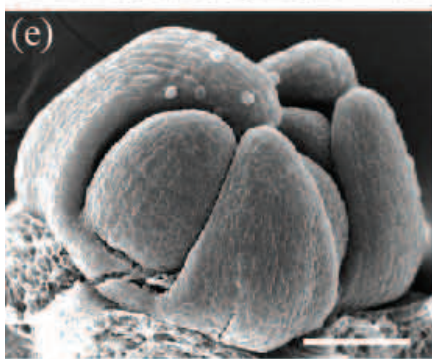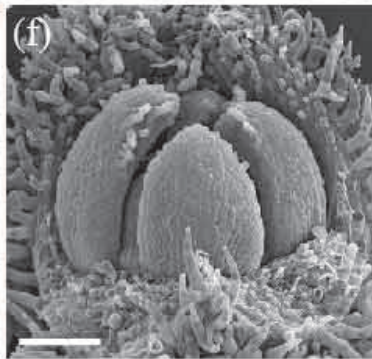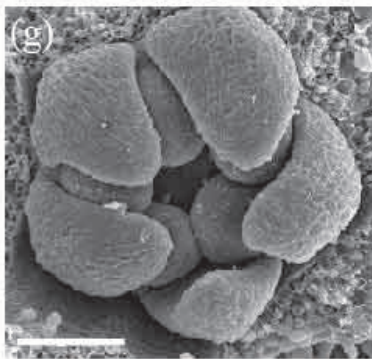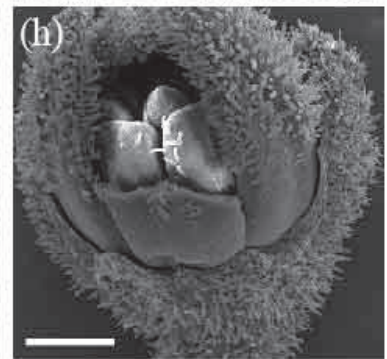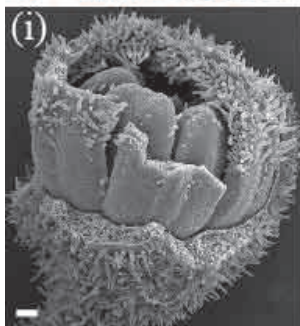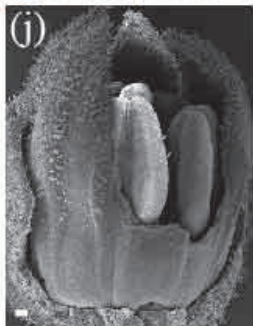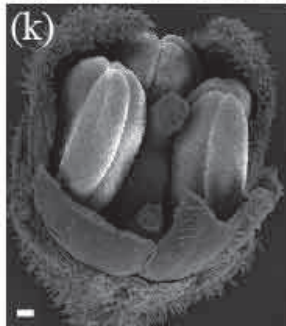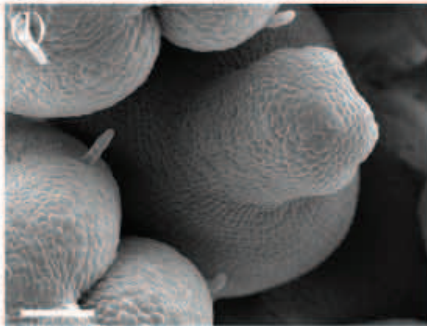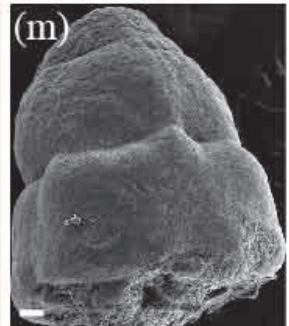

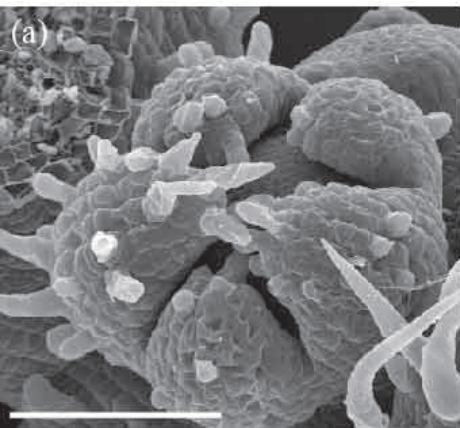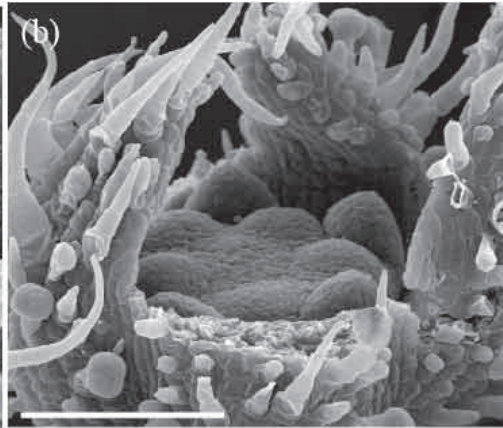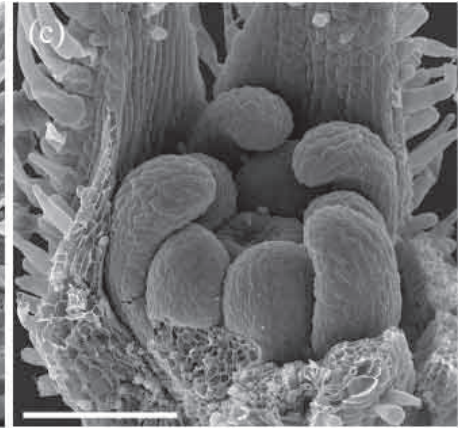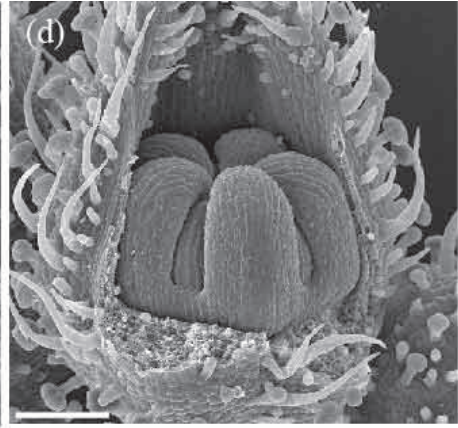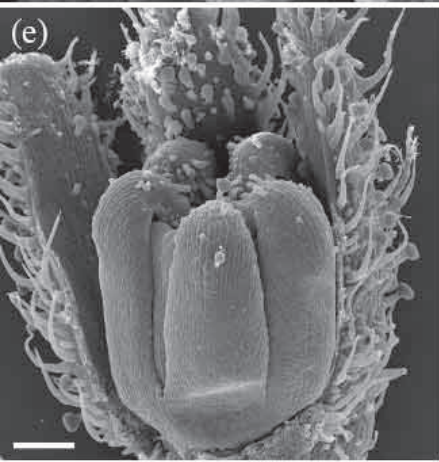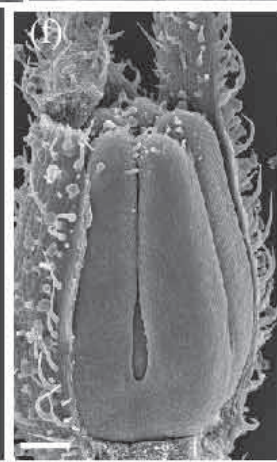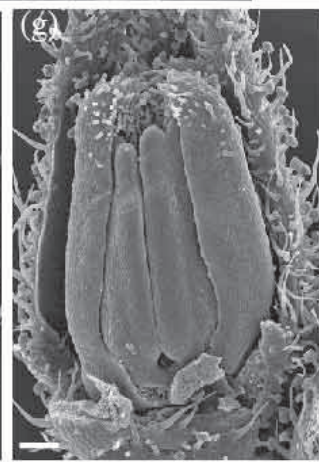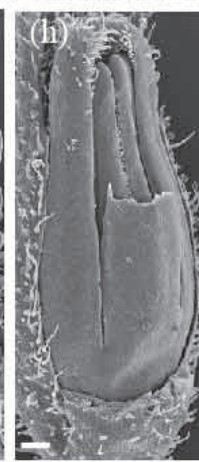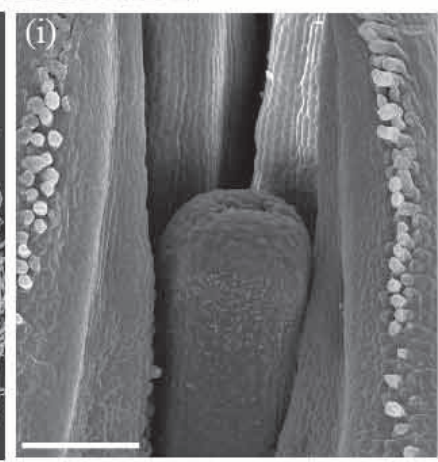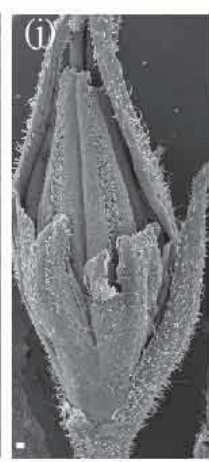

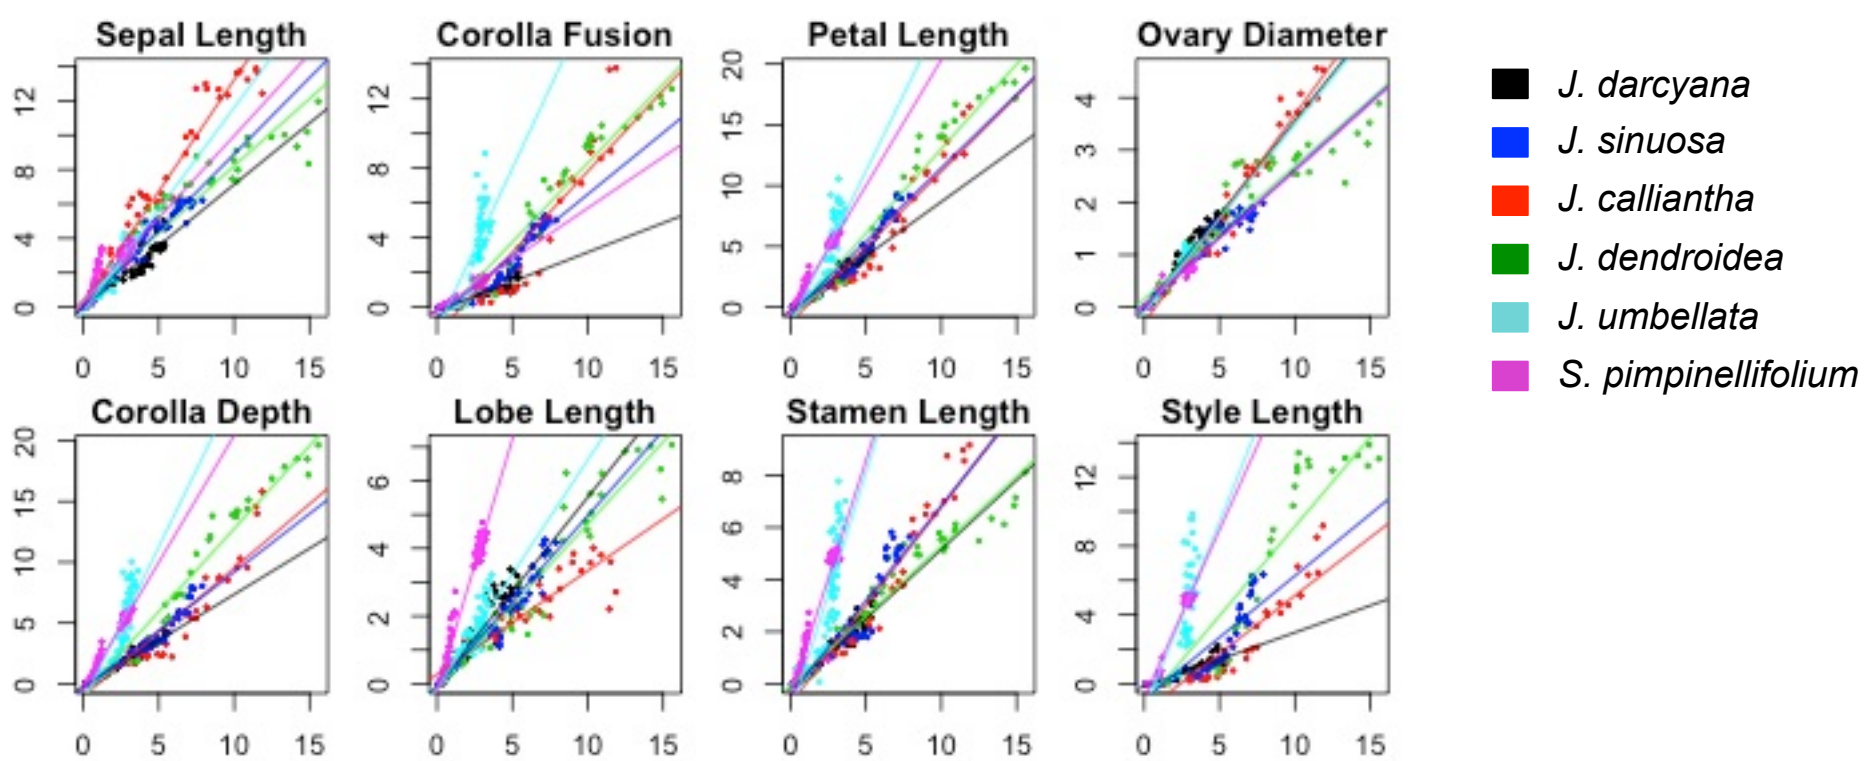

Source: http://www.biorxiv.org/content/10.1101/169060v1.full.pdf
